# Supplementary material for: The Ecological Responses of Bacterioplankton During a Phaeocystis Globosa Bloom in Beibu Gulf, China Highlighted by Integrated Metagenomics and Metatranscriptomics
Source: Research Square preprint supplement (doi:10.21203/rs.3.rs-1011939/v1), 2021-10-29
Supplement: Supplementary file 1 [file 6e06ac03c376ed78a3ab1567.xlsx]

## Sheet: Sheet1
Table S1. Environmental parameters measured for water samples.
Sample	Sampling date	Latitude (°N)	Longitude (°E)	T (°C)	S (psu)	DO (mg/L)	NH4+ (μM)	NO2- (μM)	NO3- (μM)	SiO3- (μM)	PO43- (μM)	Chl a (μg/L)	TN (μM)	Bacterial abundance (105 cells/mL)	Colony abundance (colonies/L)	Average particle size of colony (mm)
Blooming period
bP1	20180115	21°42′35″	108°35′12″	14.55	26.31	9.14	0.033	0.006	0.344	1	0.007	6.2	0.465	9.88	7.3	6.8
bP4	20180115	21°34′12″	108°35′11″	16.81	28.1	9.37	0.038	0.003	0.188	0.89	0.006	84	0.27	8.91	2.7	7
bP7	20180115	21°38′31″	108°38′12″	15.39	27.71	9.04	0.015	0.002	0.163	0.83	0.005	7.6	0.387	10.13	4.1	5.3
Recession period
rP1	20180202	21°42′35″	108°35′12″	12.38	22.71	8.99	0.05	0.003	0.196	0.37	0.024	1.4	0.539	12.2	1	3
rP4	20180202	21°34′12″	108°35′11″	13.43	28.42	8.9	0.03	0.002	0.137	0.26	0.019	1.4	0.278	10.6	1	2.4
rP7	20180202	21°38′31″	108°38′12″	13.1	29.24	8.86	0.01	0.002	0.098	0.81	0.009	1.3	0.53	12.07	1.2	1.5
Abbreviation: TN, all forms of nitrogen; NO3-, nitrate; NO2-, nitrite; NH4+, ammonium salt; PO43-, orthophosphate; S, salinity; T, temperature; DO, dissolved oxygen; and SiO3-, silicate.

## Sheet: Sheet2
Table S2. Sequence statistics of 16s RNA sequencing for all samples.
Sample	Raw reads	Clean Reads	Base(nt)	AvgLen(nt)	Q20	GC%	Effective%
Blooming period
bP1.1	88758	80112	29845853	372	85.88	48.53	90.26
bP1.2	87297	80152	29862932	372	85.89	48.65	91.82
bP1.3	82446	80101	29791229	371	85.61	49.99	97.16
bP4.1	88217	80202	29876991	372	84.23	48.38	90.91
bP4.2	84310	80160	29914625	373	83.36	48.48	95.08
bP4.3	83311	80023	29833822	372	85.96	48.83	96.05
bP7.1	87127	80162	29916909	373	85.73	48.56	92.01
bP7.2	101730	96382	35966890	373	85.74	50.11	94.74
bP7.3	88853	80190	29926463	373	86.68	49.42	90.25
Recession period
rP1.1	69927	64630	24116970	373	85	48.27	92.42
rP1.2	88415	86039	32107415	373	85.67	48.13	97.31
rP1.3	79446	76218	28451460	373	85.51	49.12	95.94
rP4.1	87957	83377	31126613	373	85.07	49.3	94.79
rP4.2	78674	74153	27656544	372	85.69	49.44	94.25
rP4.3	88018	80114	29896842	373	84.81	50.14	91.02
rP7.1	87843	80096	29896546	373	85.5	49.95	91.18
rP7.2	82938	80153	29903944	373	85.14	49.1	96.64
rP7.3	85362	80171	29916931	373	85.62	48.28	93.92
Mean	85591	80135	29889388	373	85.39	49.04	93.65
Total	1540629	1442435	538008979
Abbreviation: GC, guanine (G) and cytosine (C); Q20, the percentage of bases with Phred value greater than 20.

## Sheet: Sheet3
Table S3. Sequence statistics of metatranscriptomic sequencing for all samples.
Number of	Blooming period			Recession period			Mean
	bP1	bP4	bP7	rP1	rP4	rP7
Total Illumina reads	35265294	37926460	35057624	38144226	36276410	38977382	3.69412e+07
Quality-filtered reads a	33802112	36566440	33402894	36999598	35052084	37590612	3.5569e+07
Effective (%)	0.9585	0.9641	0.9528	0.97	0.9663	0.9644	0.9627
GC Content (%)	0.5059	0.4771	0.511	0.5164	0.5241	0.5337	0.5114
mRNA (% of high quality) b	0.8185	0.8873	0.8107	0.8617	0.8546	0.9026	0.8559
Assigned to NCBI-nr c	303764	253824	238114	360380	348338	380318	314123
Assigned to KEGG genes d	312401	232243	267338	361224	372148	400315	324278
Assigned to KOs	212385	156801	184688	245597	251763	272899	220689
Assigned to KEGG pathways	147194	108414	131516	169709	176530	189468	153805
Abbreviation: GC, guanine (G) and cytosine (C); NCBI-nr, National Center for Biotechnology Information non-redundant; KEGG, Kyoto Encyclopedia of Genes and Genomes; KO, KEGG orthology; FPKM, Fragments Per Kilobase of transcript per Million fragments mapped.
a. That is clean reads after quality filtering by removing reads containing adapter, reads containing ploy-N and low-quality reads from raw data.
b. The rRNA sequences were removed by against the NCBI rRNA, tRNA and SILVA databases using BLASTx.
c. Based on the top BLAST references, the sequences with Bacteria/Archaea NCBI-nr hits were retained for further analysis (blastp, evalue ≤1e-5).
d. The non-rRNA cDNA sequences with NBCI-nr Bacteria/Archaea hits were compared against the KEGG database using BLASTx (The BLAST Coverage Ratio ≥ 40%).

## Sheet: Sheet4
Table S4. Detailed information of KOs with significantly different expression activities based on their relative abundance in key KEGG metabolic pathways of the bacterial community. Statistical test method: two-tailed T test. The blod of gene indicates P < 0.05.
Pathway	Ko_name	Ko_defi	Ko_id	bP1	bP4	bP7	rP1	rP4	rP7	pvalues
Cell motility	flgC	flagellar basal-body rod protein FlgC	K02388	126.88	124.54	104.92	85.33	82.43	117.9	0.103863
	fliC	flagellin	K02406	3089.49	5198.15	3226.02	4868.56	6205.68	5601.15	0.174881
	fliG	flagellar motor switch protein FliG	K02410	131.45	147.93	136.47	192.13	158.17	262.03	0.327914
	flgL	flagellar hook-associated protein 3 FlgL	K02397	139.57	128.04	113.27	154.57	139.49	174.96	0.60949
	MYL12	myosin regulatory light chain 12	K12757	5.97	1.12	5.7	2.44	83.51	9.9	0.359267
	flgF	flagellar basal-body rod protein FlgF	K02391	165.96	148.85	144.96	130.9	173.67	185.21	0.758324
	MAPK1_3	mitogen-activated protein kinase 1/3	K04371	124.58	39.43	116.84	92.94	103.22	101.76	0.747133
	flgE	flagellar hook protein FlgE	K02390	659.38	690.51	681.74	726.3	729.38	730.85	0.647546
	flgI	flagellar P-ring protein precursor FlgI	K02394	198.6	179.25	158.68	254.92	191.54	268.38	0.365049
	flgM	negative regulator of flagellin synthesis FlgM	K02398	53.9	51.02	27.99	114.09	107.99	145.21	0.0157933
	mcp	methyl-accepting chemotaxis protein	K03406	852.74	510.7	259.58	670.83	386.73	325.59	0.481448
	fliK	flagellar hook-length control protein FliK	K02414	58.74	42.33	36.41	86.13	24.99	39.85	0.810236
	cheB	two-component system, chemotaxis family, response regulator CheB	K03412	55.22	65.23	38.51	114.63	58.04	54.69	0.350198
	flhA	flagellar biosynthesis protein FlhA	K02400	223.88	316.23	231.18	377.19	308.37	337.72	0.10483
	flgB	flagellar basal-body rod protein FlgB	K02387	87.47	180.03	70.52	89.78	79.81	123.89	0.468889
	PPP1C	serine/threonine-protein phosphatase PP1 catalytic subunit	K06269	162.1	60.53	193.71	82.48	185.11	134.22	0.669862
	flgH	flagellar L-ring protein precursor FlgH	K02393	119.36	68.93	104.76	115.31	102.43	133.54	0.942816
	fliI	flagellum-specific ATP synthase	K02412	145.34	85.52	153.72	178.31	177.82	259.05	0.37237
	flgA	flagella basal body P-ring formation protein FlgA	K02386	58.51	70.6	74.61	99.69	95.28	121.44	0.207362
	flhG, fleN	flagellar biosynthesis protein FlhG	K04562	89.56	83.54	91.8	136.42	116.2	125.21	0.208824
	flhC	flagellar transcriptional activator FlhC	K02402	0	0	0	12.01	0.73	13.69	0.104461
	cheA	two-component system, chemotaxis family, sensor kinase CheA	K03407	167.12	175.35	102.85	230.52	220.31	106.98	0.667257
	motB	chemotaxis protein MotB	K02557	729.83	522.8	481.27	755.31	628.58	583.35	0.907544
	flgG	flagellar basal-body rod protein FlgG	K02392	214.03	315.07	308.55	279.23	345.36	412.69	0.741918
	cheV	two-component system, chemotaxis family, response regulator CheV	K03415	90.03	83.85	9.77	50.96	18.21	11.79	0.236139
	cheX	chemotaxis protein CheX	K03409	19.05	16.95	18.42	29.36	6.88	10.31	0.365943
	fliD	flagellar hook-associated protein 2	K02407	290.96	353.92	180.42	423.69	349.93	368.17	0.0549201
	CFL	cofilin	K05765	202.9	41.18	137.98	78.76	218.04	131.62	0.930981
	dppA	dipeptide transport system substrate-binding protein	K12368	33.45	38.43	16.83	134.84	45.55	35.55	0.232965
	RAC1	Ras-related C3 botulinum toxin substrate 1	K04392	54.19	8.71	61.26	18.1	42.91	35.95	0.494483
	PFN	profilin	K05759	165.71	28.04	172.18	43.59	88.09	109.56	0.375219
	motA	chemotaxis protein MotA	K02556	187.94	139.45	177.1	259.14	210.81	195.76	0.549132
	fliF	flagellar M-ring protein FliF	K02409	204.24	221.45	260.94	250.1	252.46	268.4	0.867354
	fliP	flagellar biosynthetic protein FliP	K02419	53.52	42.81	54.3	109.07	73.43	59.25	0.219741
	fliS	flagellar protein FliS	K02422	118.22	127.64	126.36	234	232.46	219.36	0.0160247
	flgD	flagellar basal-body rod modification protein FlgD	K02389	112.68	159.69	104.3	160.07	150.54	160.02	0.234127
	fliM	flagellar motor switch protein FliM	K02416	131.62	119.87	107.01	235.83	129.84	187.78	0.155685
	flgK	flagellar hook-associated protein 1 FlgK	K02396	261.18	265.64	178.89	285.07	290.55	336.68	0.324246
	ARPC2	actin related protein 2/3 complex, subunit 2	K05758	30.45	5.37	56.56	28.5	18.02	18.76	0.447197
	cheY	two-component system, chemotaxis family, response regulator CheY	K03413	106.62	112.8	34.81	102.11	106.85	83.39	0.820809
	GSN	gelsolin	K05768	116.49	31.37	112.03	90.26	127.2	122.19	0.845637
	flhB	flagellar biosynthetic protein FlhB	K02401	73.86	99.11	77.27	87.88	90.8	121.67	0.727341
	fliE	flagellar hook-basal body complex protein FliE	K02408	33.54	31.78	18.26	66.6	50	37.74	0.0370896
	PIKFYVE, FAB1	1-phosphatidylinositol-3-phosphate 5-kinase	K00921	32.04	5.83	48.66	2.02	8.7	18.44	0.234179
	aer	aerotaxis receptor	K03776	25.34	22.51	2.8	59.04	22.94	9.49	0.490231
	cheBR	two-component system, chemotaxis family, CheB/CheR fusion protein	K13924	47.21	85.45	38.87	36.14	83.75	30.25	0.602047
	ACTB_G1	actin beta/gamma 1	K05692	3057.44	514.11	1273.93	430.62	1411.36	913.91	0.358035
	cheW	purine-binding chemotaxis protein CheW	K03408	94.92	62.94	21	105.81	22.39	41.87	0.723775
	cheZ	chemotaxis protein CheZ	K03414	84.17	31.93	51.55	53.02	19.58	15.81	0.151285
	fliR	flagellar biosynthetic protein FliR	K02421	63.91	54.08	46.46	57.4	52.89	57.17	0.409637
	cheR	chemotaxis protein methyltransferase CheR	K00575	74.13	58.11	30.2	107.36	57.3	49.84	0.631545
	ARPC4	actin related protein 2/3 complex, subunit 4	K05755	23.82	6.64	39.12	5.87	14.11	7.33	0.235357
	ARPC3	actin related protein 2/3 complex, subunit 3	K05756	18.06	6.5	20.34	21.96	20.82	15.29	0.902265
	ARPC1A_B	actin related protein 2/3 complex, subunit 1A/1B	K05757	45.69	17.09	58.25	15.64	67.78	40.06	0.797599
	cheD	chemotaxis protein CheD	K03411	12.04	6.79	1.84	3.54	7.9	5.6	0.660923
	KRAS, KRAS2	GTPase KRas	K07827	33.01	9.45	20.44	29.14	18.52	13.22	0.59601
	PIP5K	1-phosphatidylinositol-4-phosphate 5-kinase	K00889	49.15	8.24	32.87	23.65	23.93	10.85	0.319375
	fliQ	flagellar biosynthetic protein FliQ	K02420	16.69	11.85	8.87	57.4	9.25	20.07	0.345569
	fliNY, fliN	flagellar motor switch protein FliN/FliY	K02417	49.31	55.92	47.3	94.53	70.16	100.35	0.0535087
	RHOA	Ras homolog gene family, member A	K04513	16.38	4.9	6.6	12.13	22.16	18.49	0.272057
	malE	maltose/maltodextrin transport system substrate-binding protein	K10108	25.9	10.59	25.56	19.24	25.78	20.69	0.746406
	cheC	chemotaxis protein CheC	K03410	12.17	6.45	0	14.21	0.15	0	0.692937
	ARPC5	actin related protein 2/3 complex, subunit 5	K05754	0.36	0.32	18.58	2.33	1.12	13.31	0.767367
	fliH	flagellar assembly protein FliH	K02411	49.65	22.01	12.84	24.8	37.84	40.35	0.821297
	flgN	flagella synthesis protein FlgN	K02399	10.32	18.63	10.17	47.61	27.21	36.69	0.00671811
	PAK1	p21-activated kinase 1	K04409	15.43	0.88	16	4.84	19.08	22.45	0.782803
	CDC42	cell division control protein 42	K04393	37.08	1.68	13.8	3.44	23.92	14.42	0.658304
	LIMK1	LIM domain kinase 1	K05743	6.07	0.66	4.21	9.01	4.41	6.24	0.417787
	PXN	paxillin	K05760	0	0	0	1.61	2.39	0	0.147402
	fliJ	flagellar FliJ protein	K02413	31.69	6.11	3.55	39.4	5.18	11.98	0.887457
	fliT	flagellar protein FliT	K02423	0	0	0	8.63	0	4.87	0.128402
	IQGAP2_3	Ras GTPase-activating-like protein IQGAP2/3	K05767	13.23	0.13	10.93	4.48	26.25	4.96	0.824049
	DIAPH1	diaphanous 1	K05740	0	0	0.65	0	2.21	0	0.599558
	fliOZ, fliO	flagellar protein FliO/FliZ	K02418	10.65	10.15	3.62	15.15	5.49	11.23	0.652551
	tsr	methyl-accepting chemotaxis protein I, serine sensor receptor	K05874	1.76	1.48	0.37	0	0	0	0.0392642
	flhD	flagellar transcriptional activator FlhD	K02403	2.32	2.07	0	5.52	1.29	0	0.759676
	tar	methyl-accepting chemotaxis protein II, aspartate sensor receptor	K05875	0	0.57	2.55	0	0.54	2.32	0.813565
	MAP2K1, MEK1	mitogen-activated protein kinase kinase 1	K04368	0	0	0	0	3.4	0	0.373901
	mglB	methyl-galactoside transport system substrate-binding protein	K10540	2.06	3.6	0	0	0	0	0.128494
	WAS	Wiskott-Aldrich syndrome protein	K05747	0	0	9.19	0	0	0	0.373901
	flaI	flagellar rod protein FlaI	K06604	5.52	0	0	0	0	0	0.373901
	fliR-flhB	flagellar biosynthetic protein FliR/FlhB	K13820	0	0	0	0	0	1.78	0.373901
Two-component system	cusS, copS, silS	two-component system, OmpR family, heavy metal sensor histidine kinase CusS	K07644	10.06	8.18	0	40.28	6.67	18.06	0.181433
	glnD	[protein-PII] uridylyltransferase	K00990	1033.16	1112.94	477.57	460.21	415.66	613.85	0.0563532
	atoB	acetyl-CoA C-acetyltransferase	K00626	1708.48	1807.63	1841.59	3432.92	3140.49	2888.75	0.0183229
	cckA	two-component system, cell cycle sensor histidine kinase and response regulator CckA	K13587	27.8	75.23	38.98	17.24	25.46	30.16	0.0915124
	COX15	cytochrome c oxidase assembly protein subunit 15	K02259	191.68	148.61	96.33	355.39	280.4	306.92	0.00691908
	pilA	type IV pilus assembly protein PilA	K02650	182.69	182.02	65.58	531.82	225.21	149.66	0.24663
	CYC1, CYT1, petC	ubiquinol-cytochrome c reductase cytochrome c1 subunit	K00413	1394.39	1645.43	1333.7	1213.12	1142.47	1284.99	0.0339921
	cydA	cytochrome d ubiquinol oxidase subunit I	K00425	103.7	135.55	44.87	128.16	57.06	139.75	0.879042
	cusA, silA	Cu(I)/Ag(I) efflux system membrane protein CusA/SilA	K07787	158.33	142.47	42.17	787.68	387.76	417.46	0.0136733
	chvI	two-component system, OmpR family, response regulator ChvI	K14981	63.9	115.61	52.49	114.51	85.07	171.91	0.281054
	tctA	putative tricarboxylic transport membrane protein	K07793	198.04	198.55	156.47	383.88	287.68	291.4	0.00215725
	glnA, GLUL	glutamine synthetase	K01915	6744.67	19252.3	4713.38	4555.01	3546.01	4042.5	0.137882
	FAD6, desA	omega-6 fatty acid desaturase (delta-12 desaturase)	K10255	50.16	76.19	27.62	118.42	96.84	67.63	0.0521172
	pilJ	twitching motility protein PilJ	K02660	58.66	9.69	31.03	41.97	90.69	36.84	0.525924
	citE	citrate lyase subunit beta / citryl-CoA lyase	K01644	52.17	79.98	56.06	171.02	120.52	150.81	0.00312956
	UQCRFS1, RIP1, petA	ubiquinol-cytochrome c reductase iron-sulfur subunit	K00411	836.68	784.92	731.63	1237.51	968.3	1055.08	0.129547
	algR	two-component system, LytT family, response regulator AlgR	K08083	36.43	19.42	3.74	43.56	63.4	30.8	0.176573
	SIG54, rpoN	RNA polymerase sigma-54 factor	K03092	298.2	324.62	196.36	354.82	338.09	289.78	0.431662
	CYC	cytochrome c	K08738	705.31	728.98	643.1	1165.61	1041.08	841.7	0.0622698
	CYTB, petB	ubiquinol-cytochrome c reductase cytochrome b subunit	K00412	1571.57	1538.11	1268.42	1770.19	1401.14	1618.82	0.63057
	regB, regS, actS	two-component system, sensor histidine kinase RegB	K15011	29.75	56.37	19.34	76.64	58.28	68.12	0.0244574
	qseC	two-component system, OmpR family, sensor histidine kinase QseC	K07645	2.98	3.04	0.36	32.68	2.02	25.38	0.119388
	glnL, ntrB	two-component system, NtrC family, nitrogen regulation sensor histidine kinase GlnL	K07708	89.11	229.84	64.14	137.52	78.07	120.12	0.595558
	glnB	nitrogen regulatory protein P-II 1	K04751	124.46	3745.22	67.95	166.16	128.82	123.58	0.381603
	pilK	type IV pilus assembly protein PilK	K02661	6.1	3.43	10.71	1.19	13.12	7.03	0.872312
	vanX	D-alanyl-D-alanine dipeptidase	K08641	16.15	10.52	8.64	33.25	37.47	17.46	0.0728503
	fliA	RNA polymerase sigma factor for flagellar operon FliA	K02405	91.83	74.95	79.11	173.22	158.26	165.6	0.00925825
	flrC, fleR	two-component system, response regulator FlrC	K10943	135.94	150.95	122.87	197.01	223.72	234.43	0.0701016
	dctB	two-component system, NtrC family, C4-dicarboxylate transport sensor histidine kinase DctB	K10125	120.92	182.22	94.17	156.46	151.12	102.8	0.594421
	arcA	two-component system, OmpR family, aerobic respiration control protein ArcA	K07773	63.52	53.32	27.44	13.3	1.6	5.72	0.0106257
	dnaA	chromosomal replication initiator protein	K02313	613.67	609.95	355.87	772.57	738.53	561.93	0.269788
	phoB	two-component system, OmpR family, phosphate regulon response regulator PhoB	K07657	113.57	92.71	152.01	158.97	171.14	191.87	0.477386
	cydB	cytochrome d ubiquinol oxidase subunit II	K00426	43.26	47.09	17.94	85.55	43.05	31.32	0.447527
	phoA, phoB	alkaline phosphatase	K01077	114.13	100.46	57.4	104.71	99.29	105.11	0.90605
	pepD	putative serine protease PepD	K08372	12.86	5.26	18.11	146.85	56.69	45.07	0.0661597
	rpaB	two-component system, OmpR family, response regulator RpaB	K11329	18.83	19.23	26.18	97.57	66.85	35.47	0.058028
	ME2, sfcA, maeA	malate dehydrogenase (oxaloacetate-decarboxylating)	K00027	67.28	31.55	47.01	75.36	62.03	121.68	0.310646
	nifA	Nif-specific regulatory protein	K02584	1.87	10.6	0	4.52	1.6	3.04	0.754519
	cusB, silB	membrane fusion protein, Cu(I)/Ag(I) efflux system	K07798	70.41	30.19	18.02	298.58	180.45	215.64	0.00245633
	rstB	two-component system, OmpR family, sensor histidine kinase RstB	K07639	26.57	0	0.57	8.26	11.9	15.96	0.856482
	crp	CRP/FNR family transcriptional regulator, cyclic AMP receptor protein	K10914	126.38	18.21	46.58	53.69	80.85	47.37	0.734702
	pufM	photosynthetic reaction center M subunit	K08929	12.77	8.37	14.87	48.47	60.07	41.23	0.00966301
	barA	two-component system, NarL family, sensor histidine kinase BarA	K07678	32.43	30.77	6.81	27.19	38.33	22.69	0.666494
	narX	two-component system, NarL family, nitrate/nitrite sensor histidine kinase NarX	K07673	0	0	18.51	10.14	0.73	0	0.58269
	torR	two-component system, OmpR family, torCAD operon response regulator TorR	K07772	7.28	1.57	4.03	5.79	1.94	2.07	0.413588
	glnG, ntrC	two-component system, NtrC family, nitrogen regulation response regulator GlnG	K07712	151.29	479.34	90.55	238.29	180.43	172.57	0.621731
	dctQ	C4-dicarboxylate transporter, DctQ subunit	K11689	27.89	38.88	26.1	71.72	24.03	45.7	0.374981
	pucB	light-harvesting protein B-800-850 beta chain	K08939	0	1.05	0	23.73	15.4	5.79	0.0302683
	frdB	fumarate reductase iron-sulfur subunit	K00245	2.82	7.52	4.12	11.23	19.32	33.47	0.0959359
	ccoP	cytochrome c oxidase cbb3-type subunit III	K00406	354	182.28	183.77	250.8	80.72	139.38	0.184969
	regA, regR, actR	two-component system, response regulator RegA	K15012	115.75	102.34	76.62	220.96	123.61	368.61	0.188821
	phoB1, phoP	two-component system, OmpR family, alkaline phosphatase synthesis response regulator PhoP	K07658	174.35	93.01	38.62	94.24	78.13	67.52	0.483858
	uvrY	two-component system, NarL family, invasion response regulator UvrY	K07689	35.52	39.09	21.02	45.65	28.38	23.16	0.521301
	zraR, hydG	two-component system, NtrC family, response regulator HydG	K07713	7.72	0	0	12.98	12.37	26.37	0.0766029
	phoR	two-component system, OmpR family, phosphate regulon sensor histidine kinase PhoR	K07636	198.21	173.84	125.73	291.22	169.08	217.29	0.307765
	tctC	putative tricarboxylic transport membrane protein	K07795	373.51	199.67	225.59	361.72	264.88	395.46	0.715596
	phoD	alkaline phosphatase D	K01113	108.07	69.19	116.74	101.16	180.22	146.72	0.525881
	envZ	two-component system, OmpR family, osmolarity sensor histidine kinase EnvZ	K07638	71.56	103.06	58.35	100.53	127.22	94.73	0.209953
	frdA	fumarate reductase flavoprotein subunit	K00244	23.51	28.87	24.75	59.8	70.72	74.98	0.0120309
	ntrY	two-component system, NtrC family, nitrogen regulation sensor histidine kinase NtrY	K13598	68.42	69.24	60.91	127.5	90.92	120.65	0.0342899
	dctM	C4-dicarboxylate transporter, DctM subunit	K11690	181.03	228.9	96.65	272.23	135.3	156.2	0.965309
	narG	nitrate reductase alpha subunit	K00370	2.89	4.39	49.83	32.31	25.5	20.17	0.999021
	pilS	two-component system, NtrC family, sensor histidine kinase PilS	K02668	7.65	5.74	3.25	23.53	25.12	19.49	0.00200774
	tctD	two-component system, OmpR family, response regulator TctD	K07774	6.11	12.7	5.85	23.94	16.14	15.95	0.00814455
	mtrA	two-component system, OmpR family, response regulator MtrA	K07670	7.88	1.16	7.91	57.01	10.28	7.94	0.306877
	dctR	two-component system, LuxR family, response regulator DctR	K11712	0	0	0	11.1	0.43	33.79	0.22393
	rstA	two-component system, OmpR family, response regulator RstA	K07661	43.83	18.72	14.62	25	39.89	32.59	0.766036
	pilR	two-component system, NtrC family, response regulator PilR	K02667	17.74	13.39	9.77	40.48	21.65	31.38	0.0296233
	tctE	two-component system, OmpR family, sensor histidine kinase TctE	K07649	28.71	27.08	13.25	65.57	23.28	38.48	0.20197
	chpA	chemosensory pili system protein ChpA (sensor histidine kinase/response regulator)	K06596	79.35	28.92	62.4	106.83	102.58	99.24	0.175934
	ntrX	two-component system, NtrC family, nitrogen regulation response regulator NtrX	K13599	48.64	52.33	64.49	100.38	94.55	78.06	0.131416
	dctS	two-component system, LuxR family, sensor histidine kinase DctS	K11711	0	0	0	0	4.35	1.15	0.229114
	uhpC	MFS transporter, OPA family, sugar phosphate sensor protein UhpC	K07783	31.23	9.91	31.57	32.45	40.63	32.14	0.641282
	pleD	two-component system, cell cycle response regulator	K02488	11.34	17.99	14.32	33.15	22.7	20.4	0.0437973
	chvG	two-component system, OmpR family, sensor histidine kinase ChvG	K14980	66.32	116.08	73.39	119.87	132.95	159.6	0.118578
	flrA	sigma-54 specific transcriptional regulator, flagellar regulatory protein A	K10941	136.97	191.38	144.91	173.34	133.97	203.63	0.791231
	ccoN	cytochrome c oxidase cbb3-type subunit I	K00404	587.8	717.96	348.32	271.89	136.42	169.53	0.00321353
	ccoO	cytochrome c oxidase cbb3-type subunit II	K00405	97.04	49.28	51.72	74.5	124.93	58.37	0.739632
	rcsC	two-component system, NarL family, capsular synthesis sensor histidine kinase RcsC	K07677	0.51	3.64	16.27	38.44	7.39	5.79	0.56971
	pleC	two-component system, cell cycle sensor histidine kinase PleC	K07716	0.24	2.84	2.74	15.32	14.13	25.52	0.0239882
	frdC	fumarate reductase subunit C	K00246	3.14	1.47	3.38	0	19.88	5.69	0.407951
	kdpA	K+-transporting ATPase ATPase A chain	K01546	0	0	0	0	3.49	0	0.373901
	flrB, fleS	two-component system, sensor histidine kinase FlrB	K10942	31.93	72.26	39.31	45.63	63.48	46.27	0.963567
	ompR	two-component system, OmpR family, phosphate regulon response regulator OmpR	K07659	67.46	63.19	27.61	74.48	64.7	45.03	0.847876
	cpxR	two-component system, OmpR family, response regulator CpxR	K07662	16.94	53.85	2.94	22.4	8.89	8.91	0.450254
	creB	two-component system, OmpR family, catabolic regulation response regulator CreB	K07663	1.21	7.58	1.11	39.04	12.71	2.16	0.234016
	sdiA	LuxR family transcriptional regulator	K07782	19.49	15.55	12.1	18.6	26.5	16.84	0.529794
	mtrB	two-component system, OmpR family, sensor histidine kinase MtrB	K07654	5.69	0.65	5.08	37.27	15.14	6.72	0.145596
	SKN7	osomolarity two-component system, response regulator SKN7	K15859	28.52	15.78	66.92	4.3	47.13	15.17	0.440033
	kinB	two-component system, NtrC family, sensor histidine kinase KinB	K11383	0	0	0	0	0	13.57	0.373901
	phoP	two-component system, OmpR family, response regulator PhoP	K07660	21.41	34.13	34.91	29.01	42.67	42.59	0.719091
	dctP	C4-dicarboxylate-binding protein DctP	K11688	712.49	811.21	306.17	852.64	400.33	520.14	0.589627
	divK	two-component system, cell cycle response regulator DivK	K11443	17.97	12.1	4.8	10.54	7.47	1.33	0.23054
	glrR, qseF	two-component system, NtrC family, response regulator GlrR	K07715	4.47	10.7	0	8.77	31.69	18.13	0.129794
	gltI, aatJ	glutamate/aspartate transport system substrate-binding protein	K10001	53.93	26.66	24.03	109.83	33.39	27.28	0.600047
	luxO	two-component system, repressor protein LuxO	K10912	25.41	12.95	6.83	16.95	6.18	9.88	0.397574
	csrA	carbon storage regulator	K03563	153.99	233.79	45.47	93.44	85.15	89.68	0.246221
	glrK, qseE	two-component system, NtrC family, sensor histidine kinase GlrK	K07711	6.02	33.44	0.56	7.63	14.3	20.58	0.874744
	cusR, copR, silR	two-component system, OmpR family, copper resistance phosphate regulon response regulator CusR	K07665	1.08	4.42	0.89	37.51	8.32	2.02	0.255459
	phoQ	two-component system, OmpR family, sensor histidine kinase PhoQ	K07637	15.88	95.51	12.23	27.3	19.87	29.69	0.547929
	narH	nitrate reductase beta subunit	K00371	3.86	4.7	0	20.63	45.27	6.97	0.151342
	pilG	twitching motility two-component system response regulator PilG	K02657	13.49	19.02	7.75	51.81	16.03	14.45	0.316303
	cpxA	two-component system, OmpR family, sensor histidine kinase CpxA	K07640	8.09	7.3	5.87	4.64	14.16	2.84	0.86288
	fbcH	ubiquinol-cytochrome c reductase cytochrome b/c1 subunit	K00410	18.76	6.97	9.48	10.21	32.87	22.37	0.360738
	degP, htrA	serine protease Do	K04771	4.9	23.21	27.41	4.55	6.72	10.29	0.209696
	zraS, hydH	two-component system, NtrC family, sensor histidine kinase HydH	K07709	0	0	2.52	0.85	0.57	1.38	0.85887
	dpiA, citB	two-component system, CitB family, response regulator CitB	K07702	4.6	0.59	1.74	0	0	0	0.114519
	gltJ, aatQ	glutamate/aspartate transport system permease protein	K10003	9.14	0	0	2.54	7.66	3.24	0.785247
	degS	sphingolipid delta-4 desaturase	K04712	32.05	14.83	73.49	36	51.51	30.42	0.700814
	frdD	fumarate reductase subunit D	K00247	1.76	2.53	3.08	0.6	0	2.25	0.137921
	uhpA	two-component system, NarL family, uhpT operon response regulator UhpA	K07686	2.43	7.37	2.6	1.88	0	0	0.0467286
	mntB	manganese transport system permease protein	K11602	0	0	1.31	0	0	0	0.373901
	baeR, smeR	two-component system, OmpR family, response regulator BaeR	K07664	11.23	4.59	6.57	10.1	11.07	21.23	0.312399
	ABCC-BAC.COMA, comA	ATP-binding cassette, subfamily C, bacterial, competence factor transporting protein	K12292	2.71	0	0	2.82	0	0	0.881891
	pilI	twitching motility protein PilI	K02659	8.63	13.02	5.07	5.07	1.88	2.26	0.014825
	uhpB	two-component system, NarL family, sensor histidine kinase UhpB	K07675	5.87	9.26	7.17	4.9	5.72	7.77	0.225028
	ccoQ	cytochrome c oxidase cbb3-type subunit IV	K00407	6.68	4.97	3.05	9.14	7.11	16.09	0.182519
	wspE	two-component system, chemotaxis family, sensor histidine kinase and response regulator WspE	K13490	0	0	0	1.54	13	3.65	0.168023
	baeS, smeS	two-component system, OmpR family, sensor histidine kinase BaeS	K07642	3.22	11.99	1.46	12.61	1.73	13.22	0.505683
	narL	two-component system, NarL family, nitrate/nitrite response regulator NarL	K07684	0	1.76	0	23.33	4.45	3.39	0.171513
	creC	two-component system, OmpR family, sensor histidine kinase CreC	K07641	9.59	6.42	1.11	19.38	3.79	5.81	0.577298
	ctrA	two-component system, cell cycle response regulator CtrA	K13584	34.12	51.05	16.97	42.37	51.82	34.9	0.51758
	chpC	chemosensory pili system protein ChpC	K06598	0	8.41	0.98	2.38	1.31	1.04	0.560888
	citF	citrate lyase subunit alpha / citrate CoA-transferase	K01643	0	0.73	2.17	0	0	0	0.249143
	dctD	two-component system, NtrC family, C4-dicarboxylate transport response regulator DctD	K10126	44.1	18.63	23.41	35.75	25.44	46	0.842059
	luxP	autoinducer 2-binding periplasmic protein LuxP	K10910	11.06	15.54	12.13	1.19	0.73	0	0.000414171
	kdpE	two-component system, OmpR family, KDP operon response regulator KdpE	K07667	1.06	2.84	0	11.12	6.18	3.39	0.0483687
	tctB	putative tricarboxylic transport membrane protein	K07794	9.35	6.16	5.74	22.34	10.15	17.64	0.0598987
	vanY	D-alanyl-D-alanine carboxypeptidase	K07260	2.83	0.1	1.99	9.26	14.9	8.52	0.0253605
	SSK2	mitogen-activated protein kinase kinase kinase	K11230	9.88	3.18	17.88	21.81	5.52	6.96	0.781103
	ccoNO	cytochrome c oxidase cbb3-type subunit I/II	K15862	0.32	1.42	3.13	31.4	19.3	0	0.169333
	phoN	acid phosphatase (class A)	K09474	1.13	0	3.99	0.55	0.64	4.12	0.853933
	chpT	histidine phosphotransferase ChpT	K13588	6.01	11.39	6.54	6.06	15.18	2.63	0.856275
	mdtA	membrane fusion protein, multidrug efflux system	K07799	0	0	5.01	1.98	9.52	1.38	0.59803
	puhA	photosynthetic reaction center H subunit	K13991	11.97	7.5	10.02	54.01	80.79	31.71	0.0468411
	pucA	light-harvesting protein B-800-850 alpha chain	K08930	1.18	2.96	2.46	3.12	12.38	3.59	0.291534
	kdpB	K+-transporting ATPase ATPase B chain	K01547	0	0	0	0	2.21	8.56	0.236825
	atoE	short-chain fatty acids transporter	K02106	9.78	8.66	9.88	19.2	21.87	20.17	0.0200399
	natB	sodium transport system permease protein	K09696	5.31	32.32	0.06	23.81	8.02	10.64	0.887301
	cpdR	two-component system, cell cycle response regulator CpdR	K13589	3.16	9.87	0	3.83	12.75	5.02	0.484316
	mprA	two-component system, OmpR family, response regulator MprA	K07669	0.51	21.39	2.11	0.47	2.28	3.61	0.417462
	degU	two-component system, NarL family, response regulator DegU	K07692	0	0	0	1.49	1.62	0	0.1235
	pufB	light-harvesting complex 1 beta chain	K08927	9.78	11.95	9.82	24.18	36.57	25.08	0.0314232
	luxQ	two-component system, autoinducer 2 sensor kinase/phosphatase LuxQ	K10909	1.85	11.38	1.73	0	6.17	0	0.46178
	narP	two-component system, NarL family, nitrate/nitrite response regulator NarP	K07685	7.43	24.16	6.12	6.04	11.02	7.02	0.375608
	aspQ, ansB, ansA	glutamin-(asparagin-)ase	K05597	0	0	0	1.1	0.7	1.4	0.00966625
	arcB	two-component system, OmpR family, aerobic respiration control sensor histidine kinase ArcB	K07648	37.56	63.33	15.09	32.85	7.94	17.43	0.147424
	nrsA, czcA	cation efflux system protein involved in nickel and cobalt tolerance	K11326	0	0	0	0	0	6.43	0.373901
	gltK, aatM	glutamate/aspartate transport system permease protein	K10002	1.76	0	0	1.54	0	9.2	0.386337
	pilH	twitching motility two-component system response regulator PilH	K02658	15.06	10.17	2.71	19.46	26.3	4.72	0.442014
	gltL, aatP	glutamate/aspartate transport system ATP-binding protein	K10004	1.87	1.12	5.58	14.01	0	8.85	0.445044
	regX3	two-component system, OmpR family, response regulator RegX3	K07776	7.62	2.1	3.41	20.55	7.66	12.97	0.0763876
	senX3	two-component system, OmpR family, sensor histidine kinase SenX3	K07768	6.79	0.58	4.71	41.54	16.25	25.99	0.0203035
	algD	GDP-mannose 6-dehydrogenase	K00066	0.88	19.09	1.17	18.22	19.56	22.78	0.0880682
	oprD	imipenem/basic amino acid-specific outer membrane pore	K18093	0	1.16	0	10.53	2.4	14.36	0.0815999
	ampC	beta-lactamase class C	K01467	0.88	4.24	0.39	19.23	2.4	15.07	0.104194
	rpfC	two-component system, sensor histidine kinase RpfC	K10715	8.92	0	1.11	2.05	0.75	0.41	0.414798
	mdtB	multidrug efflux pump	K07788	0	0	6.31	0	5.38	15.74	0.46973
	narQ	two-component system, NarL family, nitrate/nitrite sensor histidine kinase NarQ	K07674	2.36	3.02	12.34	0	0	0	0.191652
	torS	two-component system, OmpR family, sensor histidine kinase TorS	K07647	6.56	2.28	6.2	0	0	0	0.038862
	narJ	nitrate reductase delta subunit	K00373	0.41	0.61	0.18	3.49	7.55	0	0.235484
	rpfF	DSF synthase	K13816	0.8	0.58	0.19	5.62	0.58	1	0.301226
	ttrR	two-component system, LuxR family, response regulator TtrR	K13041	2.2	0	0	1.13	0	0	0.602751
	narI	nitrate reductase gamma subunit	K00374	1.81	0.2	1.23	0.94	0	0	0.175481
	pufL	photosynthetic reaction center L subunit	K08928	8.47	12.83	20.63	52.15	61.91	18.4	0.138284
	fixL	two-component system, LuxR family, sensor kinase FixL	K14986	1.07	5.31	2.64	6.81	0	2.54	0.857317
	mntA	manganese transport system ATP-binding protein	K11603	0	0	8.64	0	0	0	0.373901
	atoC	two-component system, NtrC family, response regulator AtoC	K07714	0.13	0.16	0.59	0.4	18.16	5.85	0.212323
	nblS	two-component system, OmpR family, sensor histidine kinase NblS	K07769	0.61	0.64	6.71	0.73	1.15	8.72	0.962381
	ompF	outer membrane pore protein F	K09476	0	1.1	3.47	0	3.23	0.35	0.723307
	dctA	aerobic C4-dicarboxylate transport protein	K11103	0	0	0	1.57	8.98	1.96	0.170235
	algB	two-component system, NtrC family, response regulator AlgB	K11384	0	0	0	13.88	1.55	0	0.293551
	divJ	two-component system, cell cycle sensor histidine kinase DivJ	K11357	2.4	2.13	0	0	7.43	0	0.722616
	mprB	two-component system, OmpR family, sensor histidine kinase MprB	K07653	0	0	0.75	5.11	1.86	5.55	0.0365268
	mprF, fmtC	phosphatidylglycerol lysyltransferase	K14205	12.55	10.95	6.41	14.1	0.6	2.47	0.205615
	algZ	two-component system, LytT family, sensor histidine kinase AlgZ	K08082	0.2	2.98	0	17.89	13	0	0.15399
	yxdL	putative ABC transport system ATP-binding protein	K11635	0	0	0	0	1.46	0.39	0.227955
	vicR	two-component system, OmpR family, response regulator VicR	K07668	0	0.7	0	1.61	0.89	0	0.293588
	arlR	two-component system, OmpR family, response regulator ArlR	K18941	0	0	0	1.07	0	0	0.373901
	chpB	chemosensory pili system protein ChpB (putative protein-glutamate methylesterase)	K06597	14.44	0	0	5.62	1.21	0	0.57923
	pufA	light-harvesting complex 1 alpha chain	K08926	21.98	42.76	78.46	116.27	228.99	144.65	0.0890639
	rpaA	two-component system, OmpR family, response regulator RpaA	K10697	0	0	0	1.33	0	0	0.373901
	spo0F	two-component system, response regulator, stage 0 sporulation protein F	K02490	0	9.57	0	0.86	3.79	0	0.688152
	lrgB	holin-like protein LrgB	K05339	0	0	0	0	10.09	0	0.373901
	cqsS	two-component system, CAI-1 autoinducer sensor kinase/phosphatase CqsS	K10916	0	0	0	15.21	0	9.26	0.123835
	dltA	D-alanine--poly(phosphoribitol) ligase subunit 1	K03367	3.13	0.47	0.39	0.76	0.21	0.26	0.336894
	rpfG	two-component system, response regulator RpfG	K13815	1.2	0.54	0	10.03	0	0	0.479441
	mdtC	multidrug efflux pump	K07789	0	0	18.06	0	0	10.75	0.649803
	natA	sodium transport system ATP-binding protein	K09697	19.14	22.39	2.75	13.51	4.39	5.95	0.273635
	SLN1	osomolarity two-component system, sensor histidine kinase SLN1	K11231	0.3	0	1.61	1.23	0.83	0.66	0.974565
	desR	two-component system, NarL family, response regulator DesR	K07693	0.55	0.99	0	0	0	2.76	0.66684
	kdpD	two-component system, OmpR family, sensor histidine kinase KdpD	K07646	4.39	6.72	0.05	1.38	8.66	0.14	0.939411
	evgS, bvgS	two-component system, NarL family, sensor histidine kinase EvgS	K07679	1.27	0.57	0	5.26	0	0	0.612444
	vicK	two-component system, OmpR family, sensor histidine kinase VicK	K07652	0	0	0	0	2.19	0	0.373901
	resD	two-component system, OmpR family, response regulator ResD	K07775	0	0.43	0	0.87	0.96	3.62	0.159349
	cph1	two-component system, chemotaxis family, sensor kinase Cph1	K11354	1.2	0	0.53	0.41	0	0	0.230339
	devR	two-component system, NarL family, response regulator DevR	K07695	0	0	0	0	0	2	0.373901
	ttrA	tetrathionate reductase subunit A	K08357	0	0	18.06	0	1.08	0	0.394188
	YPD1	osomolarity two-component system, phosphorelay intermediate protein YPD1	K11232	0.6	0	1.99	0.3	4.09	2.47	0.431505
	qseB	two-component system, OmpR family, response regulator QseB	K07666	0.92	0	2.07	5.77	0	0.84	0.724562
	fixJ	two-component system, LuxR family, response regulator FixJ	K14987	0	0	0	1.66	1.23	0	0.117278
	spo0A	two-component system, response regulator, stage 0 sporulation protein A	K07699	0	0	0	7.13	0	0	0.373901
	sacB	levansucrase	K00692	0	0	0	0	3.34	4.29	0.123412
	nreC	two-component system, NarL family, response regulator NreC	K07696	0	0	0	0	0	6.85	0.373901
	pixJ	methyl-accepting chemotaxis protein PixJ	K11525	0	0	0	3.15	0	0	0.373901
	resE	two-component system, OmpR family, sensor histidine kinase ResE	K07651	0	0	0	0	0.7	0.56	0.12005
	wspA	methyl-accepting chemotaxis protein WspA	K13487	0	0	0	0	6.44	0	0.373901
	atoS	two-component system, NtrC family, sensor histidine kinase AtoS	K07710	0	0	0	0	1.41	1.13	0.119982
	torA	trimethylamine-N-oxide reductase (cytochrome c)	K07811	13.4	0.89	2.26	6.61	0.13	0.48	0.425898
	ompC	outer membrane pore protein C	K09475	0	0.12	0.35	0	1.36	0	0.60798
	malR	two-component system, CitB family, response regulator MalR	K11615	0	0	0	0	1.84	1.11	0.137877
	vanW	vancomycin resistance protein VanW	K18346	1.01	0.3	0	0	0	0	0.2407
	SSK1	osomolarity two-component system, response regulator SSK1	K11233	0	0.24	0.63	3.69	0.31	0	0.483908
	desK	two-component system, NarL family, sensor histidine kinase DesK	K07778	0	6.07	0	9.79	0	0	0.79254
	torD	TorA specific chaperone	K03533	3.02	2.2	1.22	0	0	0.86	0.0271755
	luxR	LuxR family transcriptional regulator, transcriptional activator of the bioluminescence operon	K15852	10.47	1.06	1.6	1.22	0	0.46	0.261759
	K11692, dctR	two-component system, CitB family, response regulator DctR	K11692	0.75	0.4	0.5	1.13	0.77	0	0.906269
	ssrA	two-component system, LuxR family, secretion system sensor histidine kinase SsrA	K14978	0.66	0.18	1.02	0.36	1.16	3.58	0.415737
	torC	trimethylamine-N-oxide reductase (cytochrome c), cytochrome c-type subunit TorC	K03532	3.68	1.19	1.35	0.32	0.14	0	0.0721795
	kinA	two-component system, sporulation sensor kinase A	K02491	0	0	0	0.16	0	1.63	0.325104
	K11521, manR	two-component system, OmpR family, manganese sensing response regulator	K11521	1.7	1.51	0	0	0	0	0.125908
Membrane transport	rbsB	ribose transport system substrate-binding protein	K10439	213.29	155.83	224.81	551.69	400.7	475.63	0.012758
	msbA	ATP-binding cassette, subfamily B, bacterial MsbA	K11085	268.22	180.14	154.48	323.4	247.8	257.52	0.336785
	proX	glycine betaine/proline transport system substrate-binding protein	K02002	942.85	698.92	798.84	2868.43	1293.99	1211.4	0.134024
	ftsY	fused signal recognition particle receptor	K03110	201.04	175.75	139.37	413.22	324.24	328.78	0.00129218
	PTS-EI.PTSI, ptsI	phosphotransferase system, enzyme I, PtsI	K08483	91.74	25.87	38.19	181.8	89.79	108.61	0.103476
	livF	branched-chain amino acid transport system ATP-binding protein	K01996	321.98	307.55	333.08	517.74	434.02	458.3	0.148045
	secF	preprotein translocase subunit SecF	K03074	277.39	311.5	164.43	397.27	210.37	259.58	0.923388
	livK	branched-chain amino acid transport system substrate-binding protein	K01999	2828.26	2355.4	2494.15	6327.02	3642.53	2959.24	0.19898
	secD	preprotein translocase subunit SecD	K03072	666.25	714.62	454.87	882.05	658.65	906.18	0.238775
	mlaD, linM	phospholipid/cholesterol/gamma-HCH transport system substrate-binding protein	K02067	174.46	79.53	73.01	204.96	142.19	153.13	0.359063
	afuC, fbpC	iron(III) transport system ATP-binding protein	K02010	152.63	116.77	109.78	265.93	166.05	164.6	0.134384
	ABC.FEV.A	iron complex transport system ATP-binding protein	K02013	63.9	32.53	22.97	163.52	91.98	87.37	0.0335633
	virB10, lvhB10	type IV secretion system protein VirB10	K03195	3.98	2.98	10.47	0	16.56	6.41	0.9015
	nrtA, nasF, cynA	nitrate/nitrite transport system substrate-binding protein	K15576	23.95	573.75	5.77	23.99	5.8	0.66	0.353963
	secB	preprotein translocase subunit SecB	K03071	232.4	130.03	94.17	334.52	182.51	253.41	0.219402
	vgrG	type VI secretion system secreted protein VgrG	K11904	27.14	8.66	32.59	50.98	47.54	26.16	0.370647
	oppF	oligopeptide transport system ATP-binding protein	K10823	53.05	25.86	28.95	57.88	50.92	54.19	0.30467
	pstA	phosphate transport system permease protein	K02038	155.43	222.11	231.4	309.9	424.62	429.61	0.107048
	ABC.LPT.A, lolD	lipoprotein-releasing system ATP-binding protein	K09810	128.44	117.43	66.09	181.28	104.99	140.78	0.324323
	aotM	arginine/ornithine transport system permease protein	K10023	9.84	1.09	2.13	33.84	5.22	3.25	0.431965
	secE	preprotein translocase subunit SecE	K03073	318	195.36	198.95	296.32	286.67	324.48	0.634206
	tolC	outer membrane protein	K12340	543.38	359.54	308.11	620.48	514.23	497.15	0.394785
	ftsX	cell division transport system permease protein	K09811	86.73	92.21	84.01	110.21	125.95	110.37	0.334494
	yajC	preprotein translocase subunit YajC	K03210	177.16	98.46	82.64	213.9	206.7	141.68	0.263973
	yejA	microcin C transport system substrate-binding protein	K13893	167.13	183.61	133.3	226.61	248.83	325.71	0.122058
	SRP54, ffh	signal recognition particle subunit SRP54	K03106	673.9	595.17	620.73	1053.02	1025.57	924.97	0.0592554
	mlaE, linK	phospholipid/cholesterol/gamma-HCH transport system permease protein	K02066	98.54	77.66	73.97	159.89	116.14	123.77	0.0505436
	gspE	general secretion pathway protein E	K02454	151.49	80.45	113.32	275.71	207.66	293.22	0.0435704
	pstS	phosphate transport system substrate-binding protein	K02040	553.18	598.02	772.8	1638.85	1450.09	1615.14	0.0124253
	pstC	phosphate transport system permease protein	K02037	213.57	196.06	195.11	399.99	486.42	387.2	0.0236623
	proV	glycine betaine/proline transport system ATP-binding protein	K02000	199.19	151.24	130.08	312.24	285.78	225.57	0.0400626
	potF	putrescine transport system substrate-binding protein	K11073	315.9	638.68	250.36	396.91	201.81	202.05	0.126756
	yidC, spoIIIJ, OXA1	YidC/Oxa1 family membrane protein insertase	K03217	832.57	910.25	718.47	963.45	792.53	787.03	0.117971
	secY	preprotein translocase subunit SecY	K03076	6592.88	5399.4	4565.8	4030.58	3071.66	3598.84	0.0202352
	thiY	putative hydroxymethylpyrimidine transport system substrate-binding protein	K15598	48.69	33.64	50.76	24.97	16.86	44.79	0.196293
	troD, mntD, znuB	manganese/zinc/iron transport system permease protein	K11709	37.57	12.84	16.8	16.78	23.13	27.4	0.767077
	gspG	general secretion pathway protein G	K02456	62.15	28.52	60.37	140.9	88.58	115.7	0.0575192
	rbsA	ribose transport system ATP-binding protein	K10441	83.46	30.13	50.92	80.95	80.34	107.72	0.337719
	gtsA, glcE	glucose/mannose transport system substrate-binding protein	K17315	703.51	742.07	617.74	668.17	1425.75	1242.7	0.282012
	lapB	ATP-binding cassette, subfamily C, bacterial LapB	K12541	289.76	239.76	283.27	336.42	319.97	446.89	0.508976
	smoE, mtlE	sorbitol/mannitol transport system substrate-binding protein	K10227	568.13	402.05	459.08	610.76	514.2	492.49	0.849504
	livM	branched-chain amino acid transport system permease protein	K01998	337.19	292.09	278.33	782.04	468.49	352.76	0.147831
	ABC-2.CPSE.P1	capsular polysaccharide transport system permease protein	K10107	33.58	48.82	29.7	37.43	73.76	32.73	0.665157
	ccmA	heme exporter protein A	K02193	87.29	75.28	37.34	109.97	87.81	143.08	0.171545
	znuB	zinc transport system permease protein	K09816	9.35	11.55	7.7	26.36	30.68	24.57	0.00377369
	aapQ, bztB	general L-amino acid transport system permease protein	K09970	475.27	993.32	453.93	540.92	415.83	300.88	0.0810503
	opuC	osmoprotectant transport system substrate-binding protein	K05845	179.85	32.83	261.74	1302.32	535.1	410.36	0.093039
	gtsB, glcF	glucose/mannose transport system permease protein	K17316	85.1	51.45	31.93	64.65	105.47	83.47	0.381398
	gspC	general secretion pathway protein C	K02452	30.71	13.9	13	36.86	32.24	30.66	0.170986
	livH	branched-chain amino acid transport system permease protein	K01997	221.95	217.46	255.8	526.73	426.1	289.77	0.105779
	pstB	phosphate transport system ATP-binding protein	K02036	112.56	160.88	152.75	208.87	235.79	191.18	0.204156
	tupA, vupA	tungstate transport system substrate-binding protein	K05772	31.07	34.37	43.27	43.08	49.11	66.24	0.453284
	PTS-EI.PTSP, ptsP	phosphotransferase system, enzyme I, PtsP	K08484	158.97	181	138.39	279.31	276.69	284.77	0.00826573
	K17213	inositol transport system substrate-binding protein	K17213	10.56	14.49	26.43	18.21	14.86	10.01	0.462504
	proW	glycine betaine/proline transport system permease protein	K02001	156.94	252.77	151.27	286.98	364.02	323.58	0.0512693
	yxeM	putative amino-acid transport system substrate-binding protein	K16961	48.83	26.39	12.17	13.82	4.49	12.27	0.137945
	aguE	alpha-1,4-digalacturonate transport system substrate-binding protein	K17241	28.42	18.19	44.97	34.95	83.35	59.54	0.333534
	tatC	sec-independent protein translocase protein TatC	K03118	245.34	506.46	341.98	340.02	360.49	272.68	0.295097
	afuB, fbpB	iron(III) transport system permease protein	K02011	115.73	160.54	141.22	324.28	304.49	180.31	0.0647927
	ABC.GGU.P, gguB	putative multiple sugar transport system permease protein	K10547	0.73	1.86	0	9.17	3.88	4.18	0.024609
	livG	branched-chain amino acid transport system ATP-binding protein	K01995	443.83	696.23	419.1	895.39	490.46	380.88	0.938427
	nrtB, nasE, cynB	nitrate/nitrite transport system permease protein	K15577	2.28	150.56	6.46	4.44	3	0.96	0.345529
	thiB, tbpA	thiamine transport system substrate-binding protein	K02064	202.75	762.59	205.05	133.61	62.15	59.41	0.0985809
	PTS-Fru-EIIC, fruA	PTS system, fructose-specific IIC component	K02770	2.14	1.73	0.39	5.57	2.17	22.31	0.267551
	urtD	urea transport system ATP-binding protein	K11962	9.81	69.01	3.92	9.95	5.55	3.14	0.326398
	afuA, fbpA	iron(III) transport system substrate-binding protein	K02012	270.06	323.69	240.81	548.62	473.17	400.51	0.00229649
	lptG	lipopolysaccharide export system permease protein	K11720	119.8	82.61	49.71	157.69	148.34	136.83	0.0719741
	urtA	urea transport system substrate-binding protein	K11959	16.13	1041.59	38.94	86.97	77.54	41.68	0.419633
	oppD	oligopeptide transport system ATP-binding protein	K15583	77.11	17.64	53.35	76.22	101.27	99.82	0.255706
	ABC-2.CPSE.P	capsular polysaccharide transport system permease protein	K09688	2.88	8.94	4.97	0.14	2.47	1.34	0.0455438
	dppC	dipeptide transport system permease protein	K12370	14.73	21.93	1.01	14.77	13.51	6.2	0.812765
	aapM, bztC	general L-amino acid transport system permease protein	K09971	398.14	636.76	286.76	317.86	225.62	210.69	0.0169255
	secG	preprotein translocase subunit SecG	K03075	275.76	294.81	157.71	300.01	207.94	209.59	0.324911
	glpQ	glycerol transport system permease protein	K17323	53.84	16.17	21.5	7.77	44.29	26.94	0.681202
	aapP, bztD	general L-amino acid transport system ATP-binding protein	K09972	203.08	268.44	155.7	198.51	148.45	164.15	0.00496075
	metI	D-methionine transport system permease protein	K02072	1.91	0.43	2.63	1.26	11.82	4.46	0.309318
	yejF	microcin C transport system ATP-binding protein	K13896	84.01	81.62	22.21	69.58	95.1	115.46	0.358024
	cysW	sulfate transport system permease protein	K02047	4.31	0	0	4.12	0.61	16	0.36144
	secDF	SecD/SecF fusion protein	K12257	528.42	279.09	321.14	513.23	412.01	295.44	0.752949
	mlaC	phospholipid transport system substrate-binding protein	K07323	121.89	53.64	79.91	192.86	116.98	147.59	0.164287
	frcB	fructose transport system substrate-binding protein	K10552	319.96	451.65	378.71	796.49	475.49	427.91	0.254089
	xylH	D-xylose transport system permease protein	K10544	22.7	37.54	49.79	18.03	99.56	61.16	0.552194
	PXA	ATP-binding cassette, subfamily D (ALD), peroxisomal long-chain fatty acid import protein	K15628	105.92	4.42	63.41	36.13	45.05	43.37	0.454076
	mlaF, linL, mkl	phospholipid/cholesterol/gamma-HCH transport system ATP-binding protein	K02065	96.72	127.46	67.53	219.82	94.31	149.58	0.197784
	potD	spermidine/putrescine transport system substrate-binding protein	K11069	280.95	279.03	195.83	597.23	344.46	242.28	0.275542
	gspD	general secretion pathway protein D	K02453	180.06	201.86	160.65	272.23	300.03	363.3	0.075556
	glpS	glycerol transport system ATP-binding protein	K17324	136.11	90.7	97.74	89.09	83.41	91.72	0.167137
	phnE	phosphonate transport system permease protein	K02042	34.42	28.68	36.93	44.76	50.97	79.74	0.260359
	dppD	dipeptide transport system ATP-binding protein	K12371	40.09	27.56	5.33	35.59	2	11.94	0.476281
	secA	preprotein translocase subunit SecA	K03070	1470.21	1108.18	1029.04	1898.79	1671.84	1992.27	0.117922
	oppA, mppA	oligopeptide transport system substrate-binding protein	K15580	323.66	71.13	127.35	161.54	321.38	281.37	0.621496
	malK, mtlK, thuK	multiple sugar transport system ATP-binding protein	K10111	115.24	83.07	55.59	91.69	143.42	142.77	0.333301
	yejB	microcin C transport system permease protein	K13894	21.74	20.01	26.34	27.38	27.64	53.76	0.434249
	potA	spermidine/putrescine transport system ATP-binding protein	K11072	54.04	75.32	32.32	144.36	89.61	56.04	0.161088
	ABC-2.LPSE.A	lipopolysaccharide transport system ATP-binding protein	K09691	56.44	35.35	33.17	32.73	38.23	90.69	0.754193
	nodI	lipooligosaccharide transport system ATP-binding protein	K09695	10.95	0.71	10.75	66.21	16.68	11.56	0.254461
	gtsC, glcG	glucose/mannose transport system permease protein	K17317	253.14	217.78	143.12	119.78	59.92	45.84	0.00897681
	ABC.LPT.P, lolC, lolE	lipoprotein-releasing system permease protein	K09808	192.31	158.11	174.87	294.61	207.73	274.38	0.21305
	tauB	taurine transport system ATP-binding protein	K10831	44.63	93.02	55.21	55.32	41.89	47.25	0.0959451
	PTS-HPR.FRUB, fruB, fpr	phosphocarrier protein FPr	K11183	13.86	1.07	2.53	0.93	5.51	8.03	0.76092
	ABCC-BAC	ATP-binding cassette, subfamily C, bacterial	K06148	21.95	13.86	32.04	55.41	69.39	65.66	0.0401087
	phnC	phosphonate transport system ATP-binding protein	K02041	21.6	43.87	13.78	60.93	73.38	73.03	0.0171864
	thiP	thiamine transport system permease protein	K02063	44.12	66.4	36.28	73.83	34.03	44.54	0.627152
	bioY	biotin transport system substrate-specific component	K03523	140.02	440.67	131.84	224.19	145.53	130.85	0.342396
	ABC-2.LPSE.P	lipopolysaccharide transport system permease protein	K09690	16.62	11.35	13.86	24.79	26.62	25.59	0.0548526
	ABC.FEV.P	iron complex transport system permease protein	K02015	26.2	43.37	12.46	108.85	16.67	39.14	0.399038
	modB	molybdate transport system permease protein	K02018	31.87	34.33	13.75	42.1	23.5	18.55	0.796695
	pvdE	putative ATP-binding cassette transporter	K06160	10.52	4.17	3.99	20.13	7.12	13.15	0.196272
	ccmB	heme exporter protein B	K02194	45.41	16.46	14.24	50.84	65.47	51.79	0.110902
	lptF	lipopolysaccharide export system permease protein	K07091	135.45	102.49	98.21	217.36	190.86	147.25	0.0644065
	nodJ	lipooligosaccharide transport system permease protein	K09694	7.33	0.58	3.17	44.36	12.77	5.6	0.213398
	urtC	urea transport system permease protein	K11961	0.99	123.48	0	6.64	14.65	12.67	0.518381
	troA, mntA, znuA	manganese/zinc/iron transport system substrate-binding protein	K11707	61.96	59.99	16.14	68.78	107.7	85.96	0.136939
	PTS-Ntr-EIIA, ptsN	PTS system, nitrogen regulatory IIA component	K02806	56.17	80.3	33.61	155.65	129.88	177.01	0.00974834
	lptB	lipopolysaccharide export system ATP-binding protein	K06861	121.41	160.03	149.31	216.24	146.38	214.26	0.447254
	troB, mntB, znuC	manganese/zinc/iron transport system ATP- binding protein	K11710	26.73	16.68	7.89	9.23	65.94	50.9	0.264784
	ugpB	sn-glycerol 3-phosphate transport system substrate-binding protein	K05813	123.83	188.1	231.57	215.69	330.88	305.28	0.372388
	gspL	general secretion pathway protein L	K02461	40.22	22.67	43.16	87.1	21.7	38.55	0.828776
	tatB	sec-independent protein translocase protein TatB	K03117	81.35	88.01	79.14	227.27	103.44	118.47	0.151479
	gspK	glucosamine kinase	K18676	0.14	13.73	1.15	15.5	4.65	8.99	0.390526
	ccmC	heme exporter protein C	K02195	145.31	105.07	114.88	150.18	167.07	187.96	0.39299
	ABCB1	ATP-binding cassette, subfamily B (MDR/TAP), member 1	K05658	126.79	51.13	209.92	53.65	129.98	92.89	0.429024
	gspF	general secretion pathway protein F	K02455	47.79	48.93	37.86	116.72	128.46	95.64	0.00528686
	ABC-2.CPSE.A	capsular polysaccharide transport system ATP-binding protein	K09689	1.62	9.95	1.68	10.08	33.31	6.62	0.252316
	aglE, ggtB	alpha-glucoside transport system substrate-binding protein	K10232	897.24	470.17	1174.59	2466.68	1777.46	1241.23	0.146575
	yejE	microcin C transport system permease protein	K13895	34.63	22.48	8.55	27.09	45.74	64.65	0.212049
	K17322, glpP	glycerol transport system permease protein	K17322	50.29	139.55	74.34	47.92	28.83	30.05	0.045076
	yddA	putative ATP-binding cassette transporter	K02471	25.24	17.96	49.26	39.18	49.4	23.86	0.969448
	znuC	zinc transport system ATP-binding protein	K09817	46.84	26.15	37.79	58.21	27.95	83.53	0.544442
	ugpE	sn-glycerol 3-phosphate transport system permease protein	K05815	2.47	21.93	14.68	19.29	25.3	19.31	0.35262
	ftsE	cell division transport system ATP-binding protein	K09812	124.37	110.98	101.39	228.78	157.42	126.79	0.154078
	thiZ	putative hydroxymethylpyrimidine transport system ATP-binding protein	K15600	20.68	8.27	1.03	2.33	7.21	16.86	0.853015
	xylF	D-xylose transport system substrate-binding protein	K10543	119.02	79.79	113.35	310.62	401.03	203.31	0.0512858
	ppkA	serine/threonine-protein kinase PpkA	K11912	1.54	1.01	0.5	3.45	28.85	17.19	0.111115
	znuA	zinc transport system substrate-binding protein	K09815	32.32	46.02	30.09	59.56	90.94	72.8	0.0542255
	glpV	glycerol transport system substrate-binding protein	K17321	1553.4	741.79	1728.14	1718.92	1798.34	1498.12	0.930201
	modC	molybdate transport system ATP-binding protein	K02017	48.02	91.52	62.06	42.24	80.55	88.55	0.892658
	frcC	fructose transport system permease protein	K10553	19.3	13.52	32.24	40.99	18.07	35.52	0.71024
	phnD	phosphonate transport system substrate-binding protein	K02044	77.61	98.56	94.26	285.97	228.62	198.17	0.0017058
	PTS-Man-EIIA, manX	PTS system, mannose-specific IIA component	K02793	18.91	19.51	18.15	45	21.71	29.17	0.137188
	K17325, glpT	glycerol transport system ATP-binding protein	K17325	84.43	92.75	95.73	42.56	108.95	63.24	0.300533
	potC	spermidine/putrescine transport system permease protein	K11070	36.98	15.69	15.27	78.64	17.32	33.63	0.422372
	virB3, lvhB3	type IV secretion system protein VirB3	K03198	0.14	2.22	0	2.53	1.65	0.44	0.433863
	rbsC	ribose transport system permease protein	K10440	34.11	26.95	30.81	53.63	64.99	87.77	0.0822288
	aglG, ggtD	alpha-glucoside transport system permease protein	K10234	44.13	18.48	29.71	103.54	152.54	40.71	0.154446
	oppB	oligopeptide transport system permease protein	K15581	46.36	30.21	22.71	27.38	39.4	38.81	0.867248
	potH	putrescine transport system permease protein	K11075	23.5	13.68	26.11	20.01	7.86	11.4	0.162019
	msmX, msmK, malK, sugC, ggtA, msiK	multiple sugar transport system ATP-binding protein	K10112	249.67	151.02	180.71	434.64	326.77	294.46	0.0603209
	macB	macrolide transport system ATP-binding/permease protein	K05685	1.02	0.52	6.92	8.04	8.77	22.61	0.190232
	yscT, sctT, hrcT	type III secretion protein T	K03228	0	0	3.32	0	0	0	0.373901
	rhaQ	rhamnose transport system permease protein	K10561	4.39	10.07	3.48	3.05	3.02	13.24	0.943811
	oppC	oligopeptide transport system permease protein	K15582	52.91	20.22	31.54	28.17	24.83	40.39	0.517999
	hasD, prtD, aprD	ATP-binding cassette, subfamily C, bacterial exporter for protease/lipase	K12536	7.36	7.02	2.61	145.85	32.51	13.4	0.205628
	potB	spermidine/putrescine transport system permease protein	K11071	21.3	70.04	27.02	45.63	73.28	45.9	0.469546
	tupB, vupB	tungstate transport system permease protein	K05773	8.54	12.45	7.1	26.71	15.63	21.17	0.0100038
	gspJ	general secretion pathway protein J	K02459	32.3	10.67	2.8	15.43	6.75	16.84	0.728698
	ABCG2.SNQ2	ATP-binding cassette, subfamily G (WHITE), member 2, SNQ2	K08712	3.43	0.14	6.24	1.15	5.84	10.35	0.652692
	rhaS	rhamnose transport system substrate-binding protein	K10559	21.97	37.49	17.62	73.4	48.62	48.67	0.00613453
	PTS-Bgl-EIIC, bglF	PTS system, beta-glucosides-specific IIC component	K02757	0	0	0	0	2.25	0.9	0.180847
	tauA	taurine transport system substrate-binding protein	K15551	304.79	755.35	271.27	409.47	422.86	361.71	0.539698
	aapJ, bztA	general L-amino acid transport system substrate-binding protein	K09969	5392.04	8400.5	6465.23	7832.74	6074.39	6162.68	0.291749
	aotQ	arginine/ornithine transport system permease protein	K10024	12.47	1.47	31.51	7.41	1.91	1.12	0.261786
	aotJ	arginine/ornithine transport system substrate-binding protein	K10022	121.1	20.47	28.37	93.04	38.82	37.88	0.789294
	urtB	urea transport system permease protein	K11960	15.12	140.56	3.71	10.09	13.21	15.89	0.399647
	modF	molybdate transport system ATP-binding protein	K05776	59.62	4.5	23.06	34.8	35.99	14.47	0.747299
	tauC	taurine transport system permease protein	K15552	153.96	237.35	184.67	124.3	180.04	142.47	0.116291
	ganP	arabinogalactan oligomer / maltooligosaccharide transport system permease protein	K15771	5.84	0.47	7.12	60.46	24.83	14.75	0.0833281
	virB4, lvhB4	type IV secretion system protein VirB4	K03199	44.12	10.76	16.13	7.62	6.57	8.3	0.166724
	ABC.FEV.S	iron complex transport system substrate-binding protein	K02016	80.06	63.27	42.95	70.24	95.79	90.38	0.370621
	potG	putrescine transport system ATP-binding protein	K11076	28.82	55.8	73.22	52.13	48.17	41.21	0.500304
	frcA	fructose transport system ATP-binding protein	K10554	16.2	41.55	18.07	52.94	57.68	46.68	0.0276658
	ugpC	sn-glycerol 3-phosphate transport system ATP-binding protein	K05816	16.85	29.19	31.12	20.69	46.69	48.76	0.486468
	ecfA2	energy-coupling factor transport system ATP-binding protein	K16787	13.86	8.43	11.98	22.28	6.64	25.93	0.522505
	PTS-Gut-EIIA, srlB	PTS system, glucitol/sorbitol-specific IIA component	K02781	0	0	0	0	1.7	0	0.373901
	cydC	ATP-binding cassette, subfamily C, bacterial CydC	K16012	29.92	21.4	23.53	12.83	27.56	7.48	0.182259
	occT, nocT	octopine/nopaline transport system substrate-binding protein	K10018	44.1	33.34	39.03	76.72	28.76	42.64	0.852981
	msmE	raffinose/stachyose/melibiose transport system substrate-binding protein	K10117	43	17.28	28.29	190.83	41.54	39.09	0.307961
	K11903, hcp	type VI secretion system secreted protein Hcp	K11903	57.96	28.8	10.12	66.1	55.06	13.28	0.73475
	ugpA	sn-glycerol 3-phosphate transport system permease protein	K05814	30.29	8.31	31.34	25.11	50.5	39.37	0.497013
	PTS-Gut-EIIB, srlE	PTS system, glucitol/sorbitol-specific IIB component	K02782	0.52	0	2.05	4.03	1.17	2.5	0.291921
	rhaT	rhamnose transport system ATP-binding protein	K10562	3.24	12.96	20.61	23.51	22.93	9.97	0.686592
	aglF, ggtC	alpha-glucoside transport system permease protein	K10233	108.09	79.3	101.86	192.95	125.43	77.96	0.655544
	eexD	ATP-binding cassette, subfamily C, bacterial EexD	K16299	12.86	8.06	14.58	62.7	29.83	78.15	0.0536701
	smoG, mtlG	sorbitol/mannitol transport system permease protein	K10229	22.53	10.81	10.66	26.9	19.72	19.1	0.365921
	thuE	trehalose/maltose transport system substrate-binding protein	K10236	71.01	2.49	27.05	45.65	129.13	55.85	0.357592
	gspM	general secretion pathway protein M	K02462	12.66	5.32	7.52	18.03	19.37	8.22	0.307516
	PTS-Nag-EIIC, nagE	PTS system, N-acetylglucosamine-specific IIC component	K02804	7.42	3.59	1.95	1.48	2.12	2.53	0.213466
	troC, mntC, znuB	manganese/zinc/iron transport system permease protein	K11708	26.62	10.88	7.35	12.07	44.38	49.59	0.250245
	xylG	D-xylose transport system ATP-binding protein	K10545	19.67	16.07	31.72	4.32	33.57	25.95	0.730757
	modA	molybdate transport system substrate-binding protein	K02020	31.58	37.27	22.17	72.74	39.26	39.43	0.104024
	cysU	sulfate transport system permease protein	K02046	2.52	0	0	2.86	8.74	1.44	0.252616
	impL, vasK, icmF	type VI secretion system protein ImpL	K11891	20.35	8.45	3.82	57.54	10.93	8.95	0.46079
	cysA	sulfate transport system ATP-binding protein	K02045	2.41	0	0	6.27	0	1.9	0.434967
	virB11, lvhB11	type IV secretion system protein VirB11	K03196	15.95	2.94	1.28	2.44	9.76	9.35	0.994351
	vasG, clpV	type VI secretion system protein VasG	K11907	29.36	34.01	18.02	35.34	35.05	20.35	0.977667
	PTS-HPR.PTSH, ptsH	phosphocarrier protein HPr	K02784	8.15	0.28	4.38	0	2.45	0	0.191963
	thiQ	thiamine transport system ATP-binding protein	K02062	14.5	19.3	12.04	38.7	21.31	20.75	0.0736016
	yxeO	putative amino-acid transport system ATP-binding protein	K16963	30.92	4.17	8.68	10.43	1.27	5.97	0.301096
	nrtC, nasD	nitrate/nitrite transport system ATP-binding protein	K15578	0	189.06	0	0	1.38	3.01	0.385588
	alsB	D-allose transport system substrate-binding protein	K10549	2.06	0.18	9.2	5.26	4.68	5.36	0.99738
	urtE	urea transport system ATP-binding protein	K11963	4.11	51.83	0.31	18.36	8.57	8.21	0.696379
	tupC, vupC	tungstate transport system ATP-binding protein	K06857	8.69	19.52	11.08	7.02	17.1	33.53	0.569888
	gspI	general secretion pathway protein I	K02458	6.67	3.63	3.37	30.39	4.49	4.62	0.402082
	tatA	sec-independent protein translocase protein TatA	K03116	57.88	47.46	51.87	134.16	108.4	78.94	0.0279489
	PTS-Fru-EIIA, fruB	PTS system, fructose-specific IIA component	K02768	4.14	0	0.22	1.18	27.34	3.6	0.345301
	PTS-Ula-EIIA, ulaC, sgaA	PTS system, ascorbate-specific IIA component	K02821	3.95	3.69	10.3	42.9	0.41	12.58	0.441371
	virD4, lvhD4	type IV secretion system protein VirD4	K03205	1.05	3.04	0.92	0.45	2.07	2.78	0.928086
	malG	maltose/maltodextrin transport system permease protein	K10110	3.43	2.39	11.22	3.56	5.45	0.73	0.415728
	lacK	lactose/L-arabinose transport system ATP-binding protein	K10191	38.02	47.48	38.28	12.91	29.16	39.53	0.126524
	PTS-Glc-EIIC, ptsG	PTS system, glucose-specific IIC component	K02779	46.29	15.16	10.08	6.21	8.9	3.7	0.185518
	virB9, lvhB9	type IV secretion system protein VirB9	K03204	4	9.39	0.61	0	0	0	0.107515
	raxB, cvaB	ATP-binding cassette, subfamily B, bacterial RaxB	K13409	1.98	6.7	3.16	9.03	15.36	6.44	0.128541
	ABC.VB12.S1, btuF	vitamin B12 transport system substrate-binding protein	K06858	11.16	5.11	10.78	5.17	0	0	0.0540755
	opuBD	osmoprotectant transport system permease protein	K05846	9.94	2.41	12.37	79.34	64.37	34.12	0.0140043
	gspH	general secretion pathway protein H	K02457	18.45	11.84	12.74	25.33	15.28	5.58	0.753972
	ecfT	energy-coupling factor transport system permease protein	K16785	11.69	2.37	2.58	9.1	10.69	19.85	0.250656
	PTS-Mtl-EIIC, mtlA	PTS system, mannitol-specific IIC component	K02800	74.93	47.83	101.32	439.39	82.61	140.4	0.282033
	aguG	alpha-1,4-digalacturonate transport system permease protein	K17243	11.35	14.25	21.98	17.9	33.7	22.82	0.485577
	ecfA1	energy-coupling factor transport system ATP-binding protein	K16786	0.36	0.76	1.84	6.16	6.39	13.22	0.0567089
	thiX	putative hydroxymethylpyrimidine transport system permease protein	K15599	4.76	2.19	3.63	4.8	19.21	15.33	0.129185
	malF	maltose/maltodextrin transport system permease protein	K10109	2.66	0	5.81	0.2	6.43	1.94	0.832697
	smoF, mtlF	sorbitol/mannitol transport system permease protein	K10228	26.15	35.25	27.64	24.15	27.69	16.16	0.0622306
	yscC, sctC	type III secretion protein C	K03219	0	0	0.88	0	5.87	0.61	0.40297
	ABC.ATM	mitochondrial ABC transporter ATM	K05663	4.16	8.63	3.58	7.89	12.08	2.52	0.647762
	ABC.GGU.A, gguA	putative multiple sugar transport system ATP-binding protein	K10548	5.19	2.09	1.57	12.26	2.46	0	0.770641
	abcA, bmrA	ATP-binding cassette, subfamily B, bacterial AbcA/BmrA	K18104	0.63	2.55	3.8	0	4.1	0.65	0.585808
	sitC	manganese/iron transport system permease protein	K11605	10.4	10.31	0.5	1.48	13.52	31.04	0.41805
	metQ	D-methionine transport system substrate-binding protein	K02073	42.66	6.86	19.74	9	8.51	22.15	0.352215
	dppF	dipeptide transport system ATP-binding protein	K12372	16.04	4.16	2.1	15.43	2.94	13.37	0.762894
	sitA	manganese/iron transport system substrate-binding protein	K11604	20.66	9.02	1.62	12.9	24.77	45.24	0.241063
	cydD	ATP-binding cassette, subfamily C, bacterial CydD	K16013	34.41	7.28	5.46	14.4	32.85	20.92	0.684515
	rbsD	D-ribose pyranase	K06726	7.96	0	0	8.64	25.03	9.79	0.147063
	tagG	teichoic acid transport system permease protein	K09692	3.08	0.55	0	9.36	6.68	17.7	0.0651045
	virB6, lvhB6	type IV secretion system protein VirB6	K03201	3.37	7.96	0.86	0.66	17.21	2.96	0.612515
	inoE	inositol-phosphate transport system substrate-binding protein	K17237	2.56	1.74	4.06	10.77	2.21	2.76	0.58769
	dasA	N,N'-diacetylchitobiose transport system substrate-binding protein	K17329	1.16	0	1.9	12.68	5.77	0.76	0.201143
	mlaB	phospholipid transport system transporter-binding protein	K07122	2.21	5.49	6.99	13.64	1.05	2.1	0.86886
	dppB	dipeptide transport system permease protein	K12369	16.43	22	9.19	24.41	2.91	9.71	0.377163
	ABC.CYST.P	cystine transport system permease protein	K10009	0	0	0	3.49	3.77	0	0.123163
	cebE	cellobiose transport system substrate-binding protein	K10240	4.31	0.53	0.94	5.85	0	8.49	0.444995
	lacE, araN	lactose/L-arabinose transport system substrate-binding protein	K10188	7.61	0	13.69	0	0	0	0.16925
	hlyB, cyaB	ATP-binding cassette, subfamily B, bacterial HlyB/CyaB	K11004	0	7.86	0	2.65	0.26	1.31	0.681903
	aotP	arginine/ornithine transport system ATP-binding protein	K10025	42.44	2.61	13.63	29.19	23.75	6.64	0.798204
	cbiQ	cobalt/nickel transport system permease protein	K02008	0.24	0	2.53	8.39	1.88	5.01	0.132528
	ccmD	heme exporter protein D	K02196	3.22	7.51	13.43	29.45	12.02	7.91	0.445434
	cbiM	cobalt/nickel transport system permease protein	K02007	0.76	0.45	0.67	2.05	2.7	0.46	0.237035
	potI	putrescine transport system permease protein	K11074	9.84	20.48	9.38	53.7	11.39	20.18	0.307322
	ABC.VB12.A, btuD	vitamin B12 transport system ATP-binding protein	K06074	13.06	0	0	0	0	0	0.373901
	PTS-Ula-EIIB, ulaB, sgaB	PTS system, ascorbate-specific IIB component	K02822	8.39	0.77	1.09	8.2	3.49	1.38	0.958554
	thuG, sugB	trehalose/maltose transport system permease protein	K10238	1.97	0.25	0.37	1.17	0	0.81	0.631244
	msmG	raffinose/stachyose/melibiose transport system permease protein	K10119	16.6	0	0	11.54	0.73	5.17	0.910223
	opuA	osmoprotectant transport system ATP-binding protein	K05847	17.82	14.87	53	126.01	86.77	51.54	0.116164
	cydCD	ATP-binding cassette, subfamily C, bacterial CydCD	K16014	1.88	0	0.37	11.17	2.09	3.68	0.134628
	hlyD, cyaD	hemolysin D	K11003	0	0	0	4.03	0	3.03	0.11661
	metN	D-methionine transport system ATP-binding protein	K02071	9.45	1.27	2.98	3.41	8.34	47.94	0.369135
	vasD, lip	type VI secretion system protein VasD	K11906	9.29	7.09	0	2.97	11.09	1.74	0.943747
	K17214	inositol transport system permease protein	K17214	1.52	0	2	9.09	1.09	0	0.5911
	msmF	raffinose/stachyose/melibiose transport system permease protein	K10118	3.77	0.6	12.23	18.97	3.92	7.11	0.747513
	glnH	glutamine transport system substrate-binding protein	K10036	0.54	0.32	0	9.59	4.57	4.69	0.00743825
	ABC.GGU.S, chvE	putative multiple sugar transport system substrate-binding protein	K10546	47.13	20.05	21.49	174.92	34.88	25.56	0.409014
	yscN, sctN, hrcN	ATP synthase in type III secretion protein N	K03224	0	0	0	10.07	3.95	0	0.163864
	PTS-Dgl-EIIC, gamP	PTS system, D-glucosamine-specific IIC component	K02765	0	0	0	9.33	0	0	0.373901
	fha1	type VI secretion system protein	K11913	5.73	5.04	0	14.8	10.31	4.65	0.127518
	PTS-Scr-EIIC, scrA	PTS system, sucrose-specific IIC component	K02810	1.55	1.38	0	0	0	0	0.125767
	K17202, eryG	erythritol transport system substrate-binding protein	K17202	0	2.16	1.06	16.78	6.82	1.05	0.175547
	aglK	alpha-glucoside transport system ATP-binding protein	K10235	26.19	13.14	11.19	9.89	29.31	14.15	0.917957
	nikB	nickel transport system permease protein	K15585	0	0	5.48	0	0	0	0.373901
	sitD	manganese/iron transport system permease protein	K11606	12.92	17.7	3.39	4.62	23.4	14.42	0.710318
	fliY	cystine transport system substrate-binding protein	K02424	0	0	0	0	9.23	0.42	0.344645
	gsiA	glutathione transport system ATP-binding protein	K13892	6.21	33.37	6.41	25.3	24.4	21.98	0.354287
	cycB, ganO	arabinogalactan oligomer / maltooligosaccharide transport system substrate-binding protein	K15770	100.01	42.45	130.65	933.42	196.53	239.38	0.18796
	cysP, sbp	sulfate transport system substrate-binding protein	K02048	4.67	0	12.18	14.27	11.59	19.11	0.252397
	araN	arabinosaccharide transport system substrate-binding protein	K17234	3.44	0	0.55	12.37	1.69	1.94	0.354789
	cbiN	cobalt/nickel transport protein	K02009	15.6	4.54	6.07	0.2	0	0.18	0.0658451
	nikA	nickel transport system substrate-binding protein	K15584	2.05	0	0	4.95	20.71	1.85	0.244471
	lysX2	putative lysine transport system permease protein	K17074	2.01	0	0	0	0	1.77	0.906295
	ABC.VB12.P, btuC	vitamin B12 transport system permease protein	K06073	0.83	0	0	0	0	0.75	0.919634
	impK, ompA, vasF, dotU	type VI secretion system protein ImpK	K11892	0.34	4.71	9.59	7.29	17.45	0.31	0.742107
	rhaP	rhamnose transport system permease protein	K10560	21.58	7.69	5.87	5.78	4.65	2.95	0.190032
	sitB	manganese/iron transport system ATP-binding protein	K11607	28	64.39	11.87	16.51	26.43	50.01	0.826671
	inoG	inositol-phosphate transport system permease protein	K17239	1.9	1.13	0	0	0	0	0.161099
	ssuC	sulfonate transport system permease protein	K15554	0	15.52	0	1.67	0	0	0.421468
	cbiO	cobalt/nickel transport system ATP-binding protein	K02006	0.71	0.27	1.07	16.32	2.94	4.92	0.12164
	tagH	teichoic acid transport system ATP-binding protein	K09693	4.32	1.77	2.56	12.47	5.37	11.65	0.0503541
	mglA	methyl-galactoside transport system ATP-binding protein	K10542	0	0	0	0	3.41	5.27	0.135907
	bioM	biotin transport system ATP-binding protein	K16784	6.45	6.6	2	14.88	9.48	12.68	0.0183543
	gsiD	glutathione transport system permease protein	K13891	0	0	8.47	0	0	0	0.373901
	PTS-HPR.PTSO, ptsO, npr	phosphocarrier protein NPr	K08485	0	0	0	17.01	0	0.87	0.334461
	stp1, pppA	serine/threonine protein phosphatase Stp1	K11915	0	0	0	6.16	0	5	0.11612
	glnP	glutamine transport system permease protein	K10037	0	0	14.35	0	11.13	0	0.739236
	PTS-Bgl-EIIA, bglF	PTS system, beta-glucosides-specific IIA component	K02755	0.42	0	0	1.27	0	0	0.629258
	occQ, nocQ	octopine/nopaline transport system permease protein	K10020	1.03	1.31	0.56	2.35	0	2.42	0.571401
	yojI	putative ATP-binding cassette transporter	K06159	0	7.68	0	4.33	0	1.75	0.858974
	ssuB	sulfonate transport system ATP-binding protein	K15555	0	0	0	0	5.04	0	0.373901
	ssuA	sulfonate transport system substrate-binding protein	K15553	0.12	0.33	0	6.24	1.72	6.86	0.0446161
	virB8, lvhB8	type IV secretion system protein VirB8	K03203	4.64	7.77	0	0	0	0	0.125797
	gsiC	glutathione transport system permease protein	K13890	0.88	0	0	0	0	7.49	0.43354
	thuF, sugA	trehalose/maltose transport system permease protein	K10237	0	0	0	0.88	1.58	4.17	0.109214
	PTS-Aga-EIID, agaE	PTS system, N-acetylgalactosamine-specific IID component	K02747	0	0	0	0	5.3	0	0.373901
	artI	arginine transport system substrate-binding protein	K09997	10	0	0	0	0	0	0.373901
	yscF, sctF	type III secretion protein F	K03221	0	0	10.96	0	0	0	0.373901
	wtpA	molybdate/tungstate transport system substrate-binding protein	K15495	0	0	0	0	0	8.21	0.373901
	K17318, lplA	putative aldouronate transport system substrate-binding protein	K17318	7.29	1.14	0	0	12.3	0	0.822392
	PTS-Mtl-EIIA, mtlA	PTS system, mannitol-specific IIA component	K02798	7.83	0.45	5.07	26.12	4.55	4.7	0.450258
	virB5, lvhB5	type IV secretion system protein VirB5	K03200	14.7	2.25	1.34	8.31	0	0	0.458944
	oleC4	oleandomycin transport system ATP-binding protein	K18232	1.83	0.1	1.28	0.73	0.58	1.18	0.505646
	artP	arginine transport system ATP-binding protein	K10000	24.38	0.3	0	0	0	1.99	0.403
	aguF	alpha-1,4-digalacturonate transport system permease protein	K17242	3.5	0.23	0.47	2.52	1.22	1.24	0.994495
	PTS-Mtl-EIIB, mtlA	PTS system, mannitol-specific IIB component	K02799	0	0	0	2.36	0	0	0.373901
	bioN	biotin transport system permease protein	K16783	1.34	2.36	0.83	2.71	1.65	1.87	0.306252
	ganQ	arabinogalactan oligomer / maltooligosaccharide transport system permease protein	K15772	0.45	0	5.46	3.05	0.25	1.83	0.695281
	lsrB	AI-2 transport system substrate-binding protein	K10555	0	0	0	2.92	0	0.52	0.250837
	PTS-Gut-EIIC, srlA	PTS system, glucitol/sorbitol-specific IIC component	K02783	21.76	6.62	26.29	172.78	20.42	30.21	0.339908
	yscJ, sctJ, hrcJ	type III secretion protein J	K03222	8.82	0	0	1.31	0.11	0.37	0.452563
	gluD	glutamate transport system permease protein	K10007	0	0	0	0	0	6.05	0.373901
	natE	neutral amino acid transport system ATP-binding protein	K11958	0	0	0	0	0	2.57	0.373901
	natC	neutral amino acid transport system permease protein	K11955	0	0	0	2.78	0	0	0.373901
	rsaD	ATP-binding cassette, subfamily C, bacterial RsaD	K12533	0	0	0	11.41	0	0	0.373901
	dppD1	dipeptide transport system ATP-binding protein	K16202	1.07	0	0	0	4.74	2.79	0.207668
	eryE	erythritol transport system ATP-binding protein	K17204	0	0.34	0.51	0.77	0	0	0.714947
	yscL, sctL	type III secretion protein L	K03223	1.7	0	0	0.87	0	0.77	0.877637
	shlB, hhdB, hpmB	hemolysin activation/secretion protein	K11017	0	0	0	1.69	0	1.45	0.116493
	K16905	fluoroquinolone transport system permease protein	K16905	1.28	0	0	1.31	0	0	0.873513
	inoF	inositol-phosphate transport system permease protein	K17238	0	0.39	2.29	0.44	0.98	0	0.535456
	PTS-Tre-EIIC, treB	PTS system, trehalose-specific IIC component	K02819	1.4	0	0	0.35	0	0	0.471664
	artQ	arginine transport system permease protein	K09999	9.08	0	0	0	0	0	0.373901
	chiF	putative chitobiose transport system permease protein	K17245	3.89	0	0	0	0	0	0.373901
	K17076, lysY	putative lysine transport system ATP-binding protein	K17076	0	0	0	1.59	0.88	2.11	0.0181319
	PTS-Fru-EIIB, fruA	PTS system, fructose-specific IIB component	K02769	3.58	0	0	0.49	1.12	0.61	0.684695
	mglC	methyl-galactoside transport system permease protein	K10541	0	3.9	0	0	0	0	0.373901
	yxeN	putative amino-acid transport system permease protein	K16962	1.24	0.37	2.09	2.4	0	0	0.447037
	PTS-Ula-EIIC, ulaA, sgaT	PTS system, ascorbate-specific IIC component	K03475	2.46	0.13	0.68	0.21	0.17	0.8	0.345068
	occP, nocP	octopine/nopaline transport system ATP-binding protein	K10021	0	0	0	0.07	14.73	1.49	0.308578
	inoK	inositol-phosphate transport system ATP-binding protein	K17240	0.19	2.35	0.91	0.94	1.28	1.09	0.862291
	K17208, ibpA	inositol transport system substrate-binding protein	K17208	0.35	0	0.85	1.63	2.68	3.62	0.0520699
	vgaB, msrA, vmlR	macrolide transport system ATP-binding/permease protein	K18231	0	0	0	0.49	0	0.67	0.141861
	gsiB	glutathione transport system substrate-binding protein	K13889	0	0	0	2.35	0	0	0.373901
	hisP	histidine transport system ATP-binding protein	K10017	0	0	0	1.27	0	0	0.373901
	iatA	inositol transport system ATP-binding protein	K17210	0	0	1.24	2.87	0	0	0.812666
	ABC-2.CYL.A, cylA	multidrug/hemolysin transport system ATP-binding protein	K11050	0	0	1.09	0.85	0	1.49	0.708739
	hisQ	histidine transport system permease protein	K10016	0	0	0	0	16.7	0	0.373901
	PTS-Gat-EIIC, gatC	PTS system, galactitol-specific IIC component	K02775	0.11	0	0.14	3.95	0.24	0.68	0.240308
	ABC.NGC.S	N-acetylglucosamine transport system substrate-binding protein	K10200	0.13	0.23	1.36	2.3	2.1	3.39	0.0727294
	artM	arginine transport system permease protein	K09998	30.37	0.43	5.8	2.47	0	0.19	0.260732
	shlA, hhdA, hpmA	hemolysin	K11016	0	0	0	0	4.08	0	0.373901
Sulfur metabolism	dmdA	dimethylsulfoniopropionate demethylase	K17486	0.000144622	0.000370781	0.000238925	7.74996e-05	5.34108e-05	7.1575e-05	0.0494
Glycosaminoglycan degradation	ARSB	arylsulfatase B	K01135	0	0	5.8e-06	1.76e-05	8.01e-06	1.24e-05	0.033627
EPS biosynthetic polymerization and transportation	UGDH, ugd	UDP-glucose 6-dehydrogenase	K00012	0.000677893	0.000581492	0.000484844	0.000629693	0.000485732	0.000472933	0.815369
	manC, cpsB	mannose-1-phosphate guanylyltransferase	K00971	0.000362206	0.000352878	0.00017944	0.00028283	0.00025616	0.000212224	0.523273
	rfbD, rmlD	dTDP-4-dehydrorhamnose reductase	K00067	0.000253003	0.000214581	0.000130884	0.000199238	0.000168181	0.000193643	0.665141
	rfbG	CDP-glucose 4,6-dehydratase	K01709	0.00013782	0.000142982	7.51e-05	8.32e-05	9.3e-05	0.000109167	0.460645
	rfbB, rffG	dTDP-glucose 4,6-dehydratase	K01710	0.000565964	0.000513831	0.000337218	0.000454655	0.000387095	0.000454131	0.928219
	rfbF	glucose-1-phosphate cytidylyltransferase	K00978	0.000103612	7.29e-05	5.49e-05	8.27e-05	9.89e-05	8.49e-05	0.164899
	rfbA, rffH	glucose-1-phosphate thymidylyltransferase	K00973	0.000388626	0.000466404	0.000169506	0.000369614	0.000258517	0.000342537	0.650705
	pgm	phosphoglucomutase	K01835	0.000217761	0.000106476	0.000115147	0.000161835	0.000108964	0.000101906	0.701165
	UGP2, galU, galF	UTP-glucose-1-phosphate uridylyltransferase	K00963	0.000310553	0.000445955	0.000222221	0.000358508	0.000281226	0.00028902	0.642281
	waaG, rfaG	UDP-glucosyltransferase	K02844	9.79e-06	1.36e-06	1.89e-06	1.31e-05	3.45e-05	2.74e-05	0.0421896
	rfbC, rmlC	dTDP-4-dehydrorhamnose 3,5-epimerase	K01790	0.000216269	0.000203717	9.46e-05	0.00017065	0.000185385	0.000187417	0.215989
	exoY	exopolysaccharide production protein ExoY	K16566	1.3e-06	1.67e-06	0	0	0	0	0.120036
	ABC-2.OM, wza	polysaccharide export outer membrane protein	K01991	0.000234512	0.000283441	0.00019992	0.000131601	0.000272667	0.000198424	0.747486
	algA, xanB, rfbA	mannose-6-phosphate isomerase	K16011	0.000152492	0.000225954	0.00016422	0.000263575	0.000219342	0.000224225	0.0598508
	galE, GALE	UDP-glucose 4-epimerase	K01784	0.000492167	0.000472538	0.000324335	0.000559353	0.000494013	0.00038785	0.0827909
	PTS-Dgl-EIIC, gamP	PTS, D-glucosamine-specific IIC component	K02765	0	0	0	9.14e-06	0	0	0.373901
	capD	UDP-glucose 4-epimerase	K17716	0.000153409	0.000223487	5.35e-05	9.97e-05	8.78e-05	8.74e-05	0.370177
	wzy	O-antigen polymerase	K13009	1.21e-06	2.15e-07	1.45e-05	3.59e-06	3.71e-06	5.21e-06	0.716882
	rfbN	rhamnosyltransferase	K12992	2.28e-06	4.09e-06	1.41e-06	1.38e-05	2.58e-06	4.98e-06	0.202455

## Sheet: Sheet5
Table S5. Detailed information of bacterial taxa matched-genes with significantly different expression activities of nutrients assimilation in membrane transport and Two-component system. The reads of gene expression in each bacterial community were shown.
Gene ID	Ko name	bP1	bP4	bP7	rP1	rP4	rP7	Taxonomy
c939828_g1	frdA	1.68	0	0.74	0	0	0	Vibrio
c952853_g1	atoB	2.48	2.2	0	0	0	0	Marinomonas
c1338766_g1	atoB	2.07	1.84	0	0	0	0	Unclassified
c1450313_g1	atoB	8.14	0	0	0	4.59	0	Acinetobacter
c1645106_g1	atoB	0	0	0	7.77	0	0	Candidatus Entotheonella
c1667466_g1	atoB	0	0	0	5.2	1.88	0	Aeromonas
c1780805_g1	atoB	0	0	0	1.45	0	1.26	Acinetobacter
c19322_g1	atoB	0	0	0	0.74	1.63	0	Psychrobacter
c341980_g2	atoB	0	1.15	0	0	0	0	Mesorhizobium
c601179_g2	atoB	0	0	0	0	0	0	Burkholderia
c688525_g1	atoB	0	0	0.1	0	1.5	2.02	Mycobacterium
c771743_g4	atoB	1.48	0.66	0.49	0.75	2.94	0.68	Bradyrhizobium
c848052_g1	citE	0	0	0	0	0	1.72	Pseudorhodoferax
c440616_g1	proW	0	0.96	1.79	0	0	0	Vibrio
c1256294_g1	afuA, fbpA	0	0	0	0	3.22	0	Vibrio
c1622572_g1	afuA, fbpA	0	0	0	0	1.25	1.99	Psychrobacter
c773506_g1	afuA, fbpA	14.24	3.91	4.44	1.11	0.22	0.18	Vibrio
c773506_g2	afuA, fbpA	1.37	0	0	0	0	0	Vibrio
c773506_g3	afuA, fbpA	4.91	0	6.48	0	0	0	Vibrio
c860879_g1	pstC	0	0	0	0	0	6.51	Pseudomonas
c1256200_g1	pstC	0	0	0	7.29	0	0	Limnobacter
c1453506_g1	pstC	0	0	0	0	0	0	Vibrio
c348990_g1	pstC	0	2.18	1.62	0	0	0	Vibrio
c385377_g1	pstC	1.43	0.26	0.38	0	0	0	Vibrio
c435343_g1	pstC	1.89	0.64	0.23	0.29	0	0	Vibrio
c510699_g1	pstC	1.24	1.11	0	0	0	0	Vibrio
c560664_g1	pstC	5.12	2.29	0.57	0.86	0	0	Vibrio
c648091_g1	pstC	0	0	0	4.75	0	0	Vibrio
c648091_g2	pstC	0.79	0	0	0.8	0.45	0.36	Vibrio
c648091_g3	pstC	2.29	0.48	0.54	0.41	0	0	Vibrio
c687266_g1	pstC	2.2	0	0	0.45	0	0	Vibrio
c753648_g5	pstC	0	0	0	1.91	0	1.63	Pseudoalteromonas
c1084458_g1	pstS	0	0	0.98	0	0	1.33	Cupriavidus
c1259630_g1	pstS	0.35	0	0	0.7	0	0	Vibrio
c1368530_g1	pstS	0	0	0	0	0	0	Alcanivorax
c150138_g1	pstS	5.73	0	0	0	0	0	Vibrio
c1586769_g1	pstS	0	0	10.02	0	0	0	Vibrio
c1727054_g1	pstS	4.55	0	3.99	0	0	0	Vibrio
c1802337_g1	pstS	1.9	0	0	0	0	0	Vibrio
c23034_g1	pstS	0	4.89	7.26	0	0	0	Micromonospora
c615574_g1	pstS	0	0	0	0	0	0	Pseudoalteromonas
c667172_g1	pstS	0	0	5.12	0	0	3.35	Vibrio
c712604_g1	pstS	13.31	2.1	5.18	1.6	0	0	Vibrio
c773781_g2	pstS	1.8	0	0	0.6	0	0	Vibrio
c819287_g1	pstS	0	0	0	0	0	0	Nitrososphaera
c943571_g1	phnD	0	0	0	2.58	0	4.34	Candidatus Pelagibacter
c1549460_g1	phnD	0	0.96	0	0	2.43	0.97	Thalassobius
c1012445_g1	mlaE, linK	0	0	0	0	6.68	0	Aureispira
c1770107_g1	mlaE, linK	11.76	0	0	0	0	0	Vibrio
c647133_g2	mlaE, linK	0	4.01	0	0	0	0	Pseudoalteromonas
c1096616_g1	atoE	1.32	0	1.74	0	0	0	Unclassified
c586021_g1	PTS-Ntr-EIIA, ptsN	2.22	0	1.68	0	0	0	Vibrio
c1164767_g1	ABC.VB12.S1, btuF	0.82	0	0.54	0	0	0	Vibrio
c1308195_g1	ABC.VB12.S1, btuF	0	0	10.24	0	0	0	Vibrio
c1709760_g1	ABC.VB12.S1, btuF	0.63	0	0	0	0.71	0	Vibrio
c1470565_g1	cusA, silA	11.45	0	0	0	0	0	Fulvivirga
c1516853_g1	cusA, silA	0	0	0	3.37	0	0	Vibrio
c281546_g1	cusA, silA	0	0	0	0	0	3.92	Congregibacter
c638060_g1	cusA, silA	0	0	0	0	0	3.43	Alteromonas
c744296_g1	cusA, silA	8.08	0	0	6.61	0	5.17	Vibrio
c78808_g1	cusA, silA	0	0	0	7.77	0	0	Vibrio
c1262807_g1	cusB, silB	2.76	0	0	0	0	1.23	Vibrio
c1273957_g1	cusB, silB	0	0	0	2.08	0	0	Pseudoalteromonas
c445869_g1	cusB, silB	0	0	0	5.99	0	0	Vibrio
c463224_g1	cusB, silB	0.9	0	0	0.46	1.02	0.41	Vibrio
c702274_g1	cusB, silB	3.02	0	0	6.19	0	0.9	Vibrio
c703941_g1	cusB, silB	0	0	0	5.09	2.78	0	Vibrio
c1367921_g1	PTS-EI.PTSP, ptsP	0	1.93	0	0	1.22	0	Pseudomonas
c1626762_g1	PTS-EI.PTSP, ptsP	0	0	1.47	0	0	0	Vibrio
c760602_g1	PTS-EI.PTSP, ptsP	0.33	0.18	0.4	0.2	2.02	1.08	Pseudomonas
c760602_g2	PTS-EI.PTSP, ptsP	0.6	0.4	0.5	0.3	1.1	0.48	Pseudomonas
c939781_g1	znuA	0	0	0	5.99	0	0	Vibrio
c1818278_g1	znuA	7.61	0	0	0	0	0	Vibrio
c246184_g1	znuA	2.91	0.33	0.97	0.37	0	0	Vibrio
c529672_g1	znuA	2.77	0	0	0	0	0	Vibrio
c984387_g1	aapM, bztC	0	0	0	0	0	3.13	Unclassified
c1041465_g1	aapM, bztC	0	0.38	0.57	0	0.48	0	Vibrio
c1119252_g1	aapM, bztC	0.54	0	0	0	0	0	Vibrio
c1522040_g1	aapM, bztC	1.27	2.25	0	0	0	0	Vibrio
c209942_g1	aapM, bztC	3.31	0	0	0.85	0	0	Vibrio
c396206_g1	aapM, bztC	4.09	0	0	0	0	0	Vibrio
c657350_g1	aapM, bztC	4.84	1.43	0	0	0	0	Vibrio
c702866_g1	aapM, bztC	3.54	0	0	0.9	1.99	0	Vibrio
c777563_g1	aapM, bztC	11.36	3.43	3.28	0.47	0.95	0.38	Vibrio
c786777_g1	aapM, bztC	21.6	7.9	7.51	2.39	3.61	1.44	Vibrio
c1108881_g1	rbsB	0	0	0	10.03	0	0	Labrenzia
c56282_g1	rbsB	2.01	0	2	0	0	0	Vibrio
c648635_g2	rbsB	6.67	0.99	2.93	0	0	0	Vibrio
c666187_g1	rbsB	0	0	0	0	0	1.8	Planktomarina
c690336_g1	rbsB	0	0	0	0	0	0	Rhizobium
c517770_g1	rbsC	0	0	0	0	2.16	0.86	Unclassified
c1309703_g1	rhaS	0	0	0	3.99	0	0	Unclassified
c1376154_g1	ssuA	0	0	0	1.18	1.31	0.53	Acinetobacter
c1190669_g1	gtsC, glcG	1.37	0	0	0	0	1.25	Vibrio
c1753960_g1	gtsC, glcG	0	0	0	1.49	0	1.29	Mesorhizobium

## Sheet: Sheet6
Table S6. Detailed information of bacterial taxa matched-genes with significantly different expression activities of extracellular secretion in membrane transport and Two-component system. The reads of gene expression in each bacterial community were shown.
Gene ID	Ko name	bP1	bP4	bP7	rP1	rP4	rP7	Taxonomy
c928974_g1	gspD	0	0	0	0	9.19	0	Psychrobacter
c1091595_g1	gspD	0	0	0	0	0	2.41	Cephaloticoccus
c1105771_g1	gspD	0	3.29	4.9	0	0	0	Vibrio
c1236290_g1	gspD	0	0	0	0	0	0	Coraliomargarita
c1456479_g1	gspD	0	0	0	0	2.88	2.25	Opitutus
c147756_g1	gspD	0	0	0	0	1.74	1.57	Citreicella
c1524240_g1	gspD	0	0	0	0	0	7.49	Pseudomonas
c1661317_g1	gspD	1.95	2.6	0	1.99	0	0	Thioalkalivibrio
c1762849_g1	gspD	0	0	2.77	0	7.09	0	Coraliomargarita
c1781504_g1	gspD	0.49	0.29	0.87	0	0	0	Vibrio
c56664_g1	gspD	1.8	1.6	0	0.92	0	0.81	Unclassified
c667753_g1	gspD	1.91	0.28	0.42	0	0	0.29	Vibrio
c786462_g5	gspD	3.54	0.29	0.86	0.54	0	0.1	Vibrio
c1366099_g1	gspE	0	0	0	11.99	0	0	Shewanella
c1457830_g1	gspE	0	0	15.53	0	0	0	Colwellia
c941298_g1	gspF	1.34	0	0	2.75	0	0	Vibrio
c1151018_g1	gspF	1.27	0	1.12	0	0	0	Vibrio
c1158009_g1	gspF	2.16	0	0	0	0	0	Vibrio
c1404947_g1	gspF	0	0	0	0	3.04	0	Limnobacter
c1458624_g1	gspF	0	0	0	0	5.43	4.1	Unclassified
c1463258_g1	gspF	0	0	0	0	3.34	0	Unclassified
c1513186_g1	gspF	0	0	0	12.31	0	0	Pseudohongiella
c771760_g2	gspF	1.09	0	0	1.11	0	0	Vibrio
c1100662_g1	gspG	0	0	0	0	3.36	0	Phycisphaera
c1132477_g1	gspG	0	0	0	0	0	0	Pseudoalteromonas
c1295970_g1	gspG	0	0	0	0	0	0	Pedosphaera
c136687_g1	gspG	0	2.84	0.84	0	0	0	Unclassified
c1595696_g1	gspG	10.71	0	0	0	0	0	Arcobacter
c217912_g1	gspG	0	0	0	0	2.25	0.64	Pedosphaera
c263950_g1	gspG	0	0	0.59	0	0.5	1.61	Opitutus
c323194_g1	gspG	1.17	2.08	0	0	0	1.04	Unclassified
c1048261_g1	secY	0	0	9.62	0	0	0	Acinetobacter
c602969_g1	secY	0	0	0	0	5.71	0	Pseudoalteromonas
c622866_g1	secY	0.9	0	0.89	1.36	0.51	1.64	Pseudomonas
c691912_g1	secY	0.13	0.06	0.09	1.31	3.55	4.3	Pseudomonas
c749179_g1	secY	8.33	0.36	2.33	2.32	3.14	0.37	Alcanivorax
c775363_g3	secY	397.4	33.92	192.5	27.91	5.44	13.78	Vibrio
c778704_g4	secY	0.55	0.25	0	1.41	3.49	1.78	Pseudomonas
c711866_g3	ffh	0	0	9.39	0	0	0	Vibrio
c771736_g2	ffh	2.02	0.84	1.86	0.16	0	0	Vibrio
c1302096_g1	ftsY	0	0	0	5.43	0	0	Marinomonas
c1328276_g1	ftsY	0	0	0	3.97	0	0	Candidatus Aquiluna
c1425342_g1	ftsY	0	0	1.84	0	0	0	Vibrio
c1533233_g1	ftsY	0	0	0	0	1.87	1.49	Candidatus Puniceispirillum
c1620367_g1	ftsY	0	0	0	0	0	1.94	Acinetobacter
c261857_g1	ftsY	2.56	0.57	0	0	0	0	Vibrio
c436958_g1	ftsY	0	0	0	4.66	0	0	Pseudoalteromonas
c529773_g1	ftsY	2.67	0	0	0	0	0	Marinomonas
c560239_g1	ftsY	0	0	0	0	0	0	Vibrio
c619694_g1	ftsY	0	0.16	1.09	0.09	1.96	0	Lactobacillus
c804792_g1	ftsY	0	0	0	0	9.19	0	Unclassified

## Sheet: Sheet7
Table S7. Detailed information of bacterial taxa matched-genes with significantly different expression activities in cell motility. The reads of gene expression in each bacterial community were shown.
Gene ID	Ko name	bP1	bP4	bP7	rP1	rP4	rP7	Taxonomy
c1225091_g1	flgC	0	0	0	1.23	1.35	1.07	Deferrisoma
c1270419_g1	flgC	9.59	0	0	0	0	0	Vibrio
c1292257_g1	flgC	4.91	0	0	0	0	0	Vibrio
c696375_g1	flgC	4.53	4.04	7.48	0	0	0	Vibrio
c11220_g1	flgN	0	0	0	4.35	0	3.58	Pseudomonas
c1254879_g1	flgN	0	8.05	0	0	0	0	Methylophaga
c14273_g1	flgN	3.35	0	0	0	0	0	Marinomonas
c1568764_g1	flgN	0	0	0	9.79	0	0	Pseudomonas
c1091378_g1	fliA	0	0	0	3.87	0	3.31	SAR116 cluster
c1215322_g1	fliA	0	0	0	0	0	2.21	Streptomyces
c144978_g1	fliA	0	0	0	1.84	0	0.81	Pseudoalteromonas
c691475_g1	fliA	1.84	0.88	2.78	0	0	0	Vibrio
c718581_g1	fliA	1.85	1.28	2.84	0.86	0.81	1.43	Unclassified
c1418376_g1	fliNY, fliN	0	0	0	5.14	0	0	Unclassified
c220313_g1	fliNY, fliN	4.22	8.45	0	0	0	0	Vibrio
c839584_g1	fliS	0	0	0	0	4.39	0	Vibrio
c1249307_g1	fliS	0	0	0	0	1.15	0.46	Pseudomonas
c1301380_g1	fliS	0	0	7.77	0	0	0	Colwellia
c1804516_g1	fliS	0	0	0	10.28	0	0	Unclassified
c581577_g1	fliS	2.14	1.28	1.27	0	0	0	Vibrio
c64066_g1	fliS	0	0.36	0	0.4	0	1.09	Candidatus Puniceispirillum
c809720_g1	fliS	0	0	0	0	7.39	0	Unclassified
c797500_g1	pilI	0	0	1.22	0	0	0	Alcanivorax
c955910_g1	flrC, fleR	0	0	0	1.71	0	1.47	Candidatus Puniceispirillum
c1225351_g1	flrC, fleR	0	0	0	0	1.77	0	Marinobacter
c1506151_g1	flrC, fleR	1.85	1.64	2.43	3.82	0	0	Candidatus Puniceispirillum
c228688_g1	flrC, fleR	2.81	0	0	0	0	4.9	Unclassified

## Sheet: Sheet8
Table S8. Detailed information of bacterial taxa matched-genes with significantly different expression activities of other functions. The reads of gene expression in each bacterial community were shown.
Gene ID	Ko name	bP1	bP4	bP7	rP1	rP4	rP7	Taxonomy
c202416_g1	ARSB	0	0	0	2.33	0	0	Niabella
c358306_g1	waaG, rfaG	0	0	0.25	0.39	1.31	0.53	Pseudomonadaceae
c857815_g1	dmdA	0	0.51	0.38	0	0	0.26	Rhodobacteraceae
c861866_g1	dmdA	0	1.72	0	0	0	0	Rhodobacteraceae
c111930_g1	dmdA	0	0.56	0	1.27	0	2.83	Rhodobacteraceae
c1317355_g1	dmdA	0	0.7	0	0	0	0.71	Rhodobacteraceae
c1379619_g1	dmdA	0	1.29	0	0	0	0	Rhodobacteraceae
c1528588_g1	dmdA	1.17	0.52	0	0	0	0	Rhodobacteraceae
c1546751_g1	dmdA	1.41	0	0	0	1.59	0	Rhodobacteraceae
c1613835_g1	dmdA	0	0.95	1.41	0	0	0	Rhodobacteraceae
c211211_g1	dmdA	0.49	4.79	0	0	0	0	Rhodobacteraceae
c673307_g1	dmdA	0	1.86	0	0	1.01	0	Rhodobacteraceae
c779015_g1	dmdA	10.54	12.97	5.9	1.74	5.59	3.05	Rhodobacteraceae
c781681_g1	dmdA	2.25	32.75	3.49	0.33	1.22	1.13	Rhodobacteraceae
c781807_g1	dmdA	0.99	29.61	2.87	0.07	0.52	0.62	Rhodobacteraceae
c782155_g1	dmdA	58.49	165	50.32	18.6	6.14	6.52	Rhodobacteraceae
c782155_g2	dmdA	3.81	15.23	3.17	2.33	1.22	3.72	Rhodobacteraceae
c782555_g1	dmdA	1.91	17.15	3.43	0.27	0.69	0.64	Rhodobacteraceae
